# Supplementary material for: Benzothiazole Derivatives Endowed with Antiproliferative Activity in Paraganglioma and Pancreatic Cancer Cells: Structure–Activity Relationship Studies and Target Prediction Analysis
Source: MDPI journal article supplement (doi:10.3390/ph15080937), 2022-07-28

## Supporting Information

### **Benzothiazole Derivatives Endowed with Antiproliferative Activity in Paraganglioma and Pancreatic Cancer Cells: Structure-Activity Relationship Studies and Target Prediction Analysis.**

Rosa Amoroso<sup>1,#</sup>, Laura De Lellis<sup>1,2,#</sup>, Rosalba Florio<sup>1</sup>, Nazaret Moreno Rodriguez<sup>3</sup>, Mariangela Agamennone<sup>1</sup>, Barbara De Filippis<sup>1</sup>, Letizia Giampietro<sup>1</sup>, Cristina Maccallini<sup>1</sup>, Inmaculada Fernández<sup>3</sup>, Rocío Recio<sup>3</sup>, Alessandro Cama<sup>1,2</sup>, Marialuigia Fantacuzzi<sup>1,\*</sup>, Alessandra Ammazalorso<sup>1,\*</sup>

1 Department of Pharmacy, “G. d’Annunzio” University of Chieti-Pescara, Via Dei Vestini 31, 66100 Chieti, Italy; rosa.amoroso@unich.it (R.A.); laura.delellis@unich.it (L.D.L.); rosalba.florio@unich.it (R.F.); mariangela.agamennone@unich.it (M.A.); barbara.defilippis@unich.it (B.D.F.); letizia.giampietro@unich.it (L.G.); cristina.maccallini@unich.it (C.M.); alessandro.cama@unich.it (A.C.).

2 Center for Advanced Studies and Technology CAST, Via Luigi Polacchi 11; 66100 Chieti, Italy.

3 Departamento de Química Orgánica y Farmacéutica, Facultad de Farmacia, Universidad de Sevilla, C/Profesor García González, 2, 41012, Sevilla, Spain; nmoreno4@us.es (N.M.R.); inmaff@us.es (I.F.F.); rrecioj@us.es (R. R.).

# These authors contributed equally to the work

Correspondence: alessandra.ammazzalorso@unich.it (A.A.); marialuigia.fantacuzzi@unich.it (M.F.).

\*Corresponding authors: Dr. Alessandra Ammazalorso, Department of Pharmacy, “G. d’Annunzio” University, Via dei Vestini 31, 66100 Chieti, Italy; Ph. +39 0871 3554682; alessandra.ammazzalorso@unich.it;

Dr. Marialuigia Fantacuzzi, Department of Pharmacy, “G. d’Annunzio” University, Via dei Vestini 31, 66100 Chieti, Italy; Ph. +39 0871 3554684; marialuigia.fantacuzzi@unich.it.

### **Table of Contents:**

|                                                                                 |        |
|---------------------------------------------------------------------------------|--------|
| Supplementary Table S1.....                                                     | page 2 |
| Supplementary Figure S1.....                                                    | page 3 |
| Supplementary Figure S2.....                                                    | page 4 |
| Supplementary Figure S3.....                                                    | page 4 |
| <sup>1</sup> H and <sup>13</sup> C spectra of final compounds <b>4a-p</b> ..... | page 5 |

**Supplementary Table S1.** Selectivity index (SI) values for compounds **2b**, **4d**, **4e**, **4f**, **4h**, **4i**, **4j** and **4m**. SI values were calculated for each compound as follows: IC<sub>50</sub> in normal (HFF-1) fibroblast cells/IC<sub>50</sub> in pancreatic (AsPC-1, BxPC-3 and Capan-2), or paraganglioma (PTJ64i, PTJ86i) cancer cells (see IC<sub>50</sub> values in **Table 2** of the main text).

|           | Selectivity index (SI) values |        |         |               |        |
|-----------|-------------------------------|--------|---------|---------------|--------|
|           | Pancreatic cancer             |        |         | Paraganglioma |        |
|           | AsPC-1                        | BxPC-3 | Capan-2 | PTJ64i        | PTJ86i |
| <b>2b</b> | 1.72                          | 1.43   | 1.09    | 2.52          | 1.28   |
| <b>4d</b> | 1.20                          | 2.31   | 1.03    | 1.36          | 0.74   |
| <b>4e</b> | 1.31                          | 1.56   | 1.18    | 1.70          | 0.88   |
| <b>4f</b> | 0.65                          | 0.35   | 0.33    | 0.53          | 0.51   |
| <b>4h</b> | 0.95                          | 0.96   | 0.65    | 1.59          | 0.70   |
| <b>4i</b> | 1.01                          | 0.81   | 0.53    | 1.74          | 1.28   |
| <b>4j</b> | 1.90                          | 1.30   | 0.75    | 1.62          | 1.04   |
| <b>4m</b> | 1.22                          | 1.05   | 0.77    | 1.32          | 0.52   |

**Supplementary Figure S1.** Effect of combined treatments with compound **4k** and gemcitabine on the viability of pancreatic cancer (AsPC-1, BxPC-3 and Capan-2) and normal (HFF-1) fibroblast cells. Cell viability was assessed by MTT assays after a 72-h incubation of cells with **4k** and gemcitabine at the indicated concentrations, as single agents or in combination. Histograms represent the means  $\pm$ SD of two independent experiments with quintuplicate determinations. Combination indexes (CIs) were calculated by CompuSyn software. Combinations assessed as synergistic by CIs  $< 1$  are indicated.

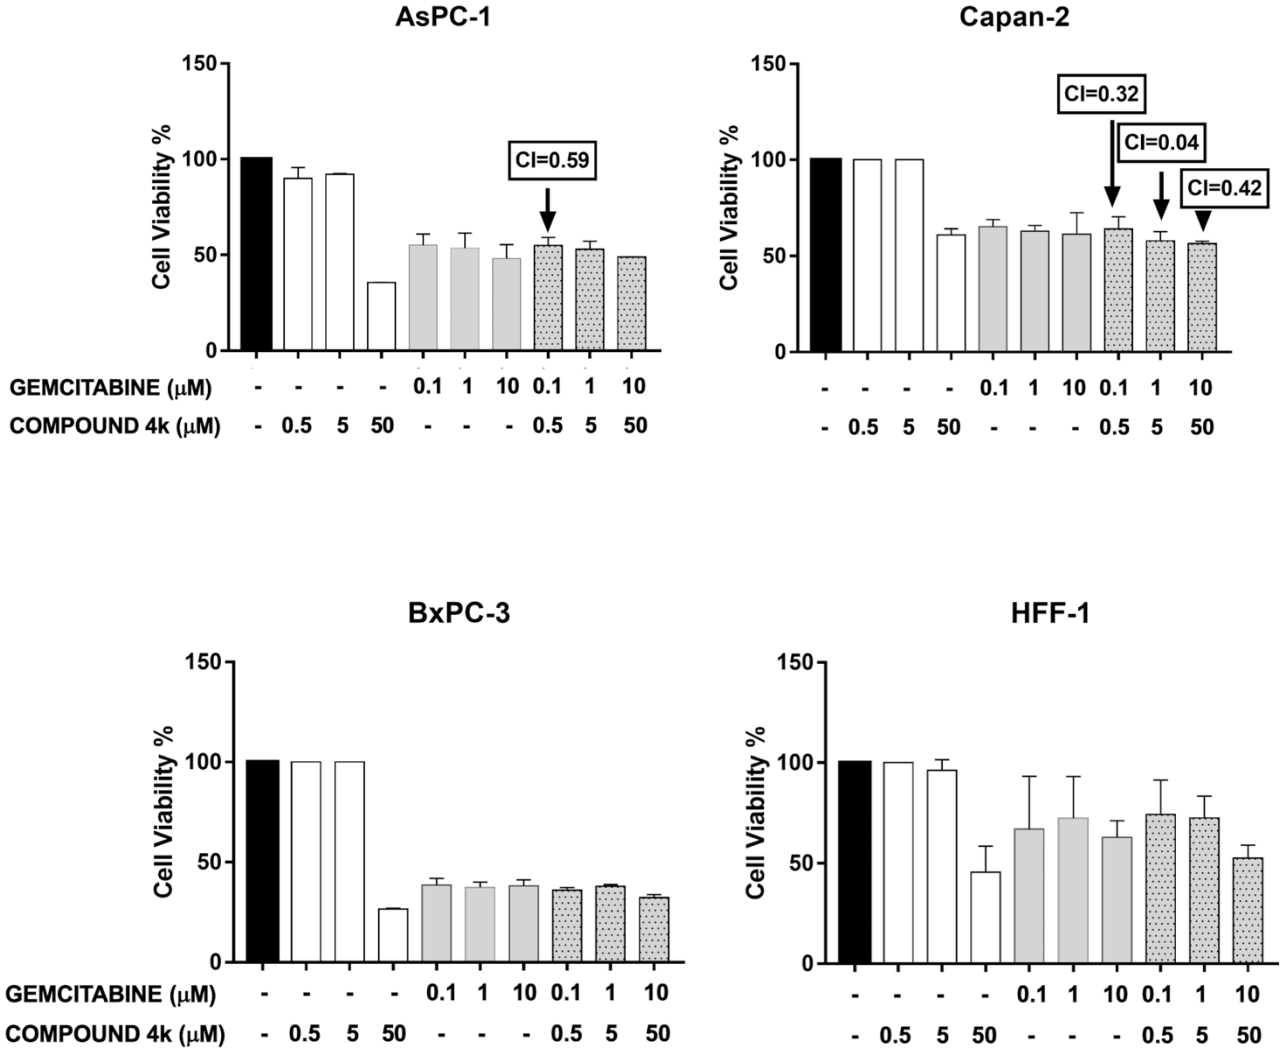

**Supplementary Figure S2.** Interaction diagram of compounds **2b**, **4a-p** in the catalytic site of CBR1 (PDB:6KPG).

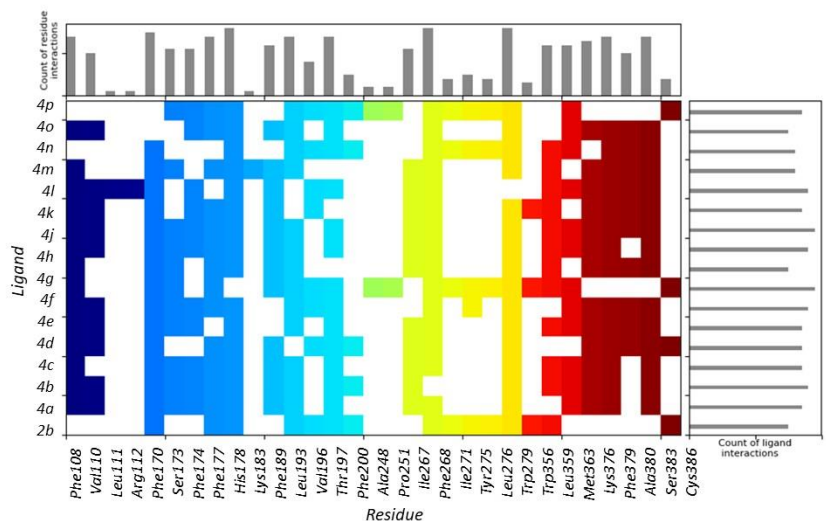

**Supplementary Figure S3.** Interaction diagram of compounds **2b**, **4a-p** in the catalytic site of the chimera SENP2-loop1 of SENP6 (PDB:3ZO5).

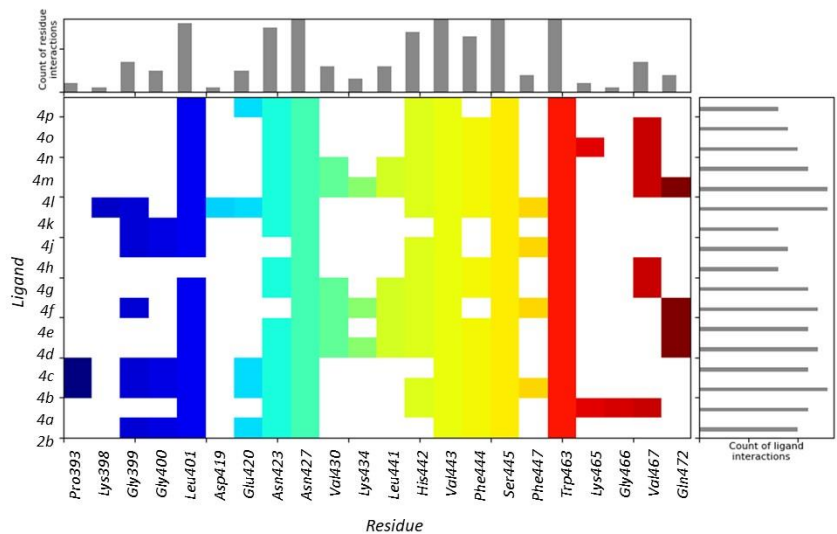



Gradient Shimming

Sample Name:

AA943A

Data Collected on:

m300-mercury300

Archive directory:

/home/ammazza/vnmrsys/data

Sample directory:

MF255\_20150422\_01

FidFile: AA943A

Pulse Sequence: PROTON (s2pul)

Solvent: cdcl3

Data collected on: Jul 9 2020

Operator: ammazza

Relax. delay 1.000 sec

Pulse 45.0 degrees

Acq. time 1.706 sec

Width 4803.1 Hz

16 repetitions

OBSERVE H1, 300.1976543 MHz

DATA PROCESSING

FT size 16384

Total time 0 min 45 sec

4a

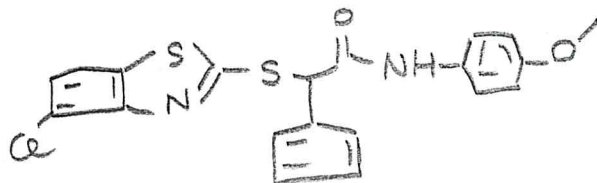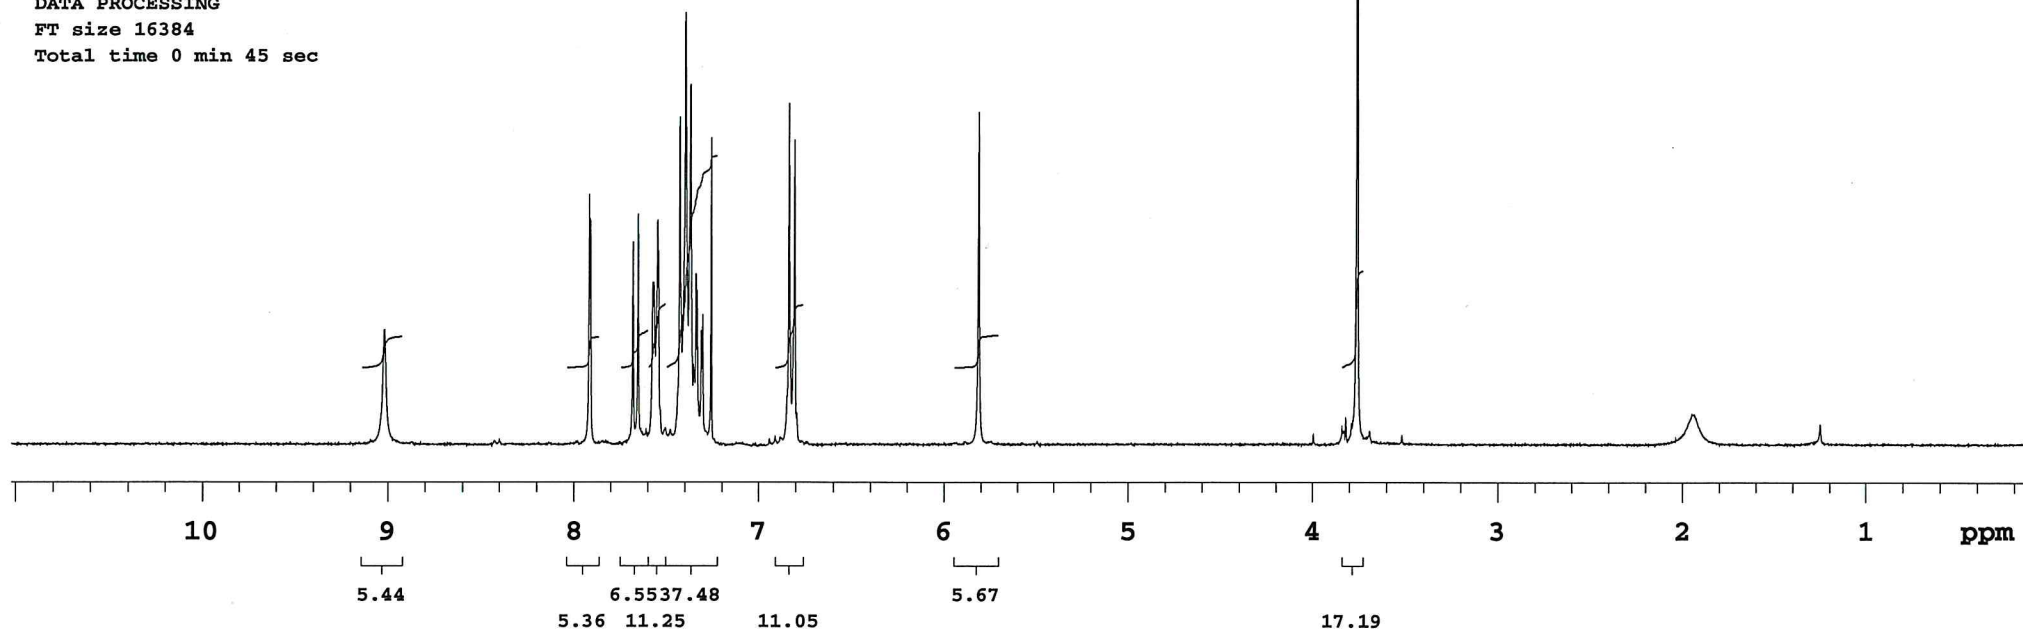

4a

Gradient Shimming

Sample Name:

AA943A

Data Collected on:

m300-mercury300

Archive directory:

/home/ammazza/vnmrsys/data

Sample directory:

MF255\_20150422\_01

FidFile: CARBON

Pulse Sequence: CARBON (s2pul)

Solvent: cdcl3

Data collected on: Jul 9 2020

Temp. 20.5 C / 293.6 K

Operator: ammazza

Relax. delay 1.000 sec

Pulse 45.0 degrees

Acq. time 0.868 sec

Width 18867.9 Hz

2880 repetitions

OBSERVE C13, 75.4847602 MHz

DECOUPLE H1, 300.1991980 MHz

Power 38 dB

continuously on

WALTZ-16 modulated

DATA PROCESSING

Line broadening 0.5 Hz

FT size 32768

Total time 21 hr, 28 min

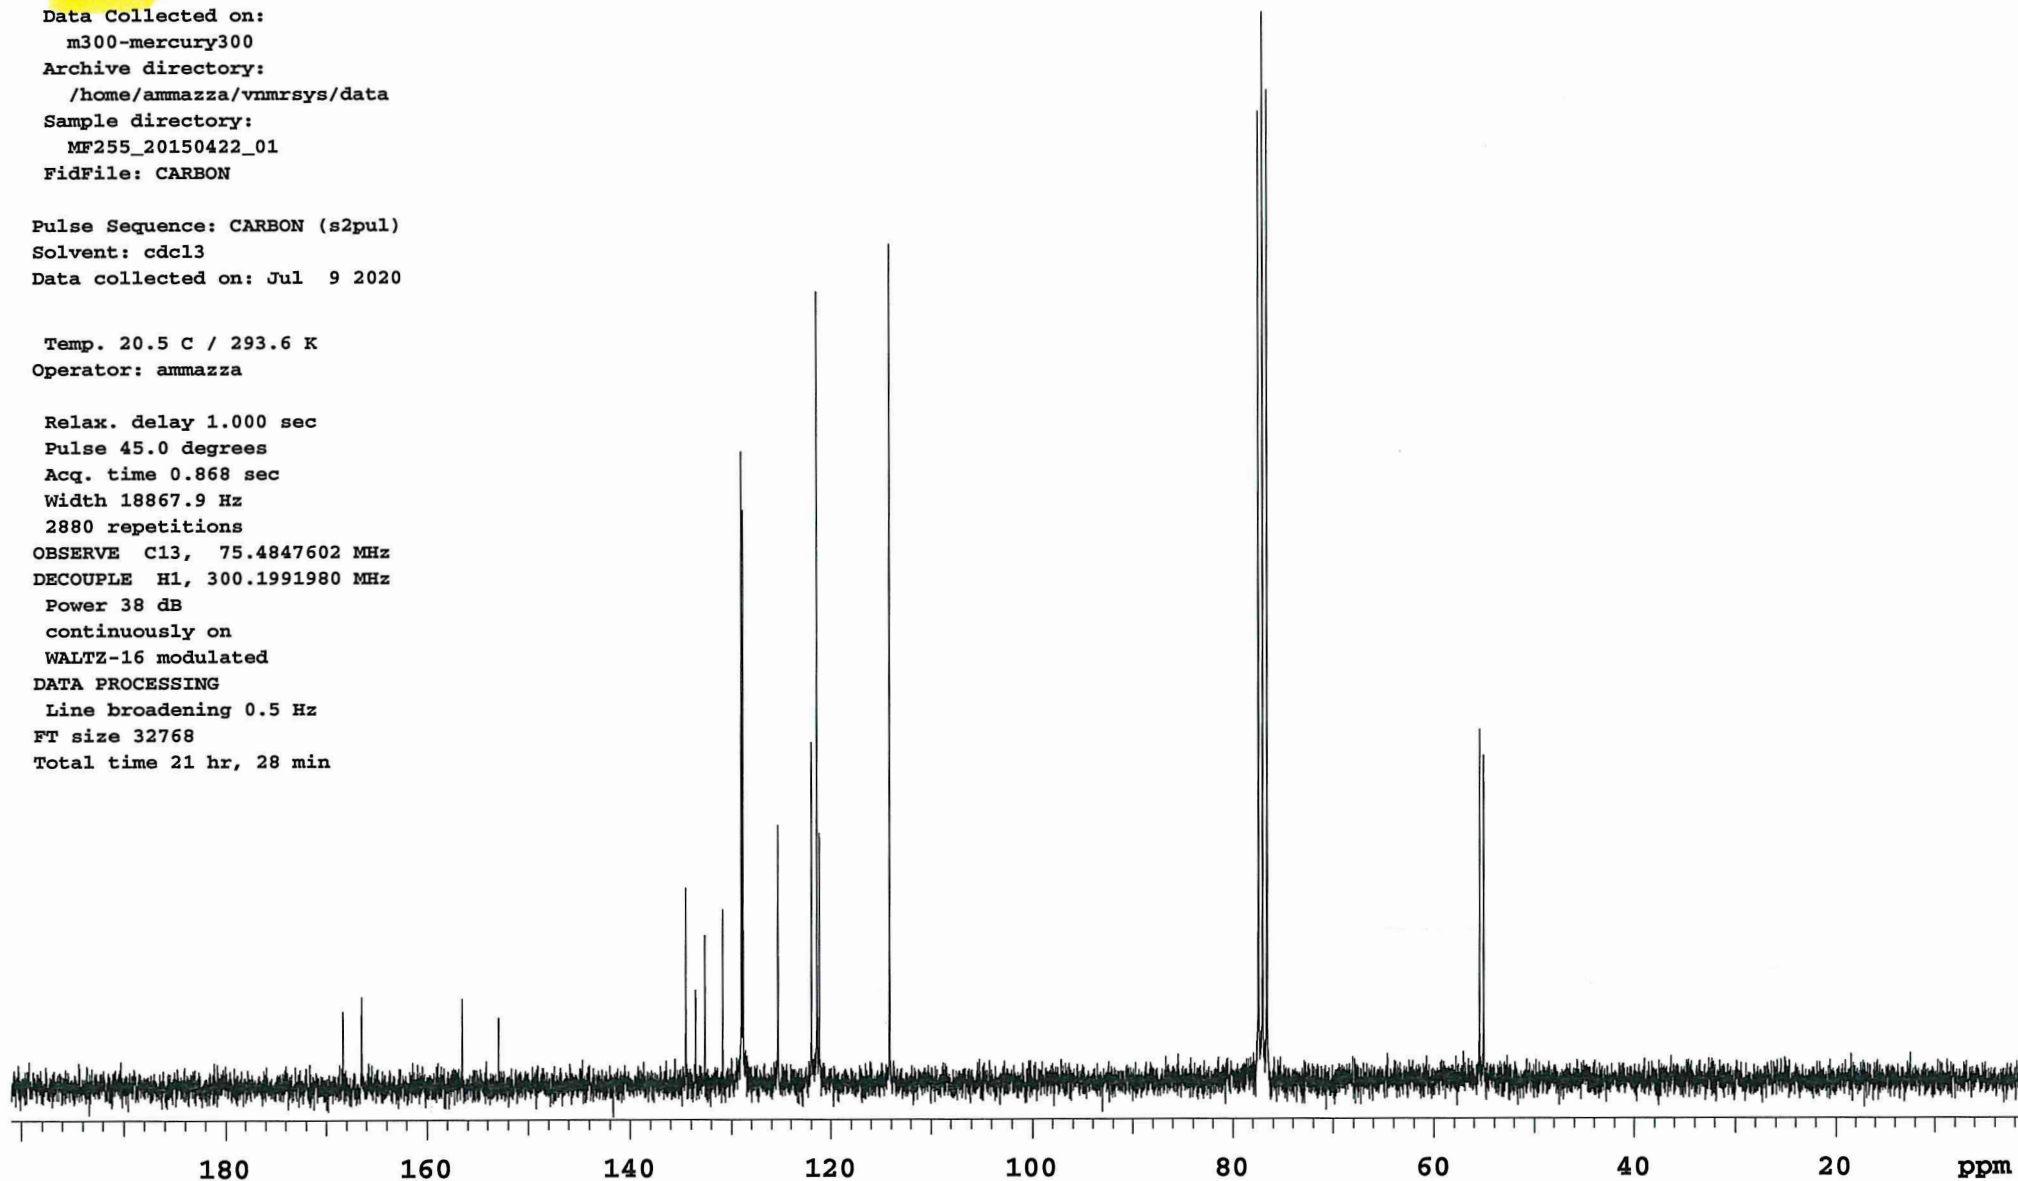

Gradient Shimming

Sample Name:

AA949B

Data Collected on:

m300-mercury300

Archive directory:

/home/ammazza/vnmrSYS/data

Sample directory:

MF255\_20150422\_01

F1File: PROTON

Pulse Sequence: PROTON (s2pul)

Solvent: cdcl3

Data collected on: Sep 28 2020

Operator: ammazza

Relax. delay 1.000 sec

Pulse 45.0 degrees

Acq. time 1.706 sec

Width 4803.1 Hz

16 repetitions

OBSERVE H1, 300.1976543 MHz

DATA PROCESSING

FT size 16384

Total time 0 min 45 sec

4b

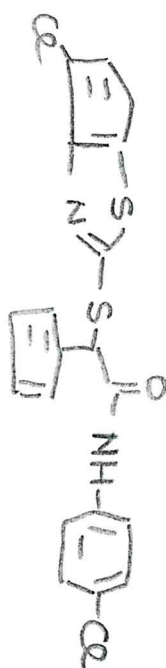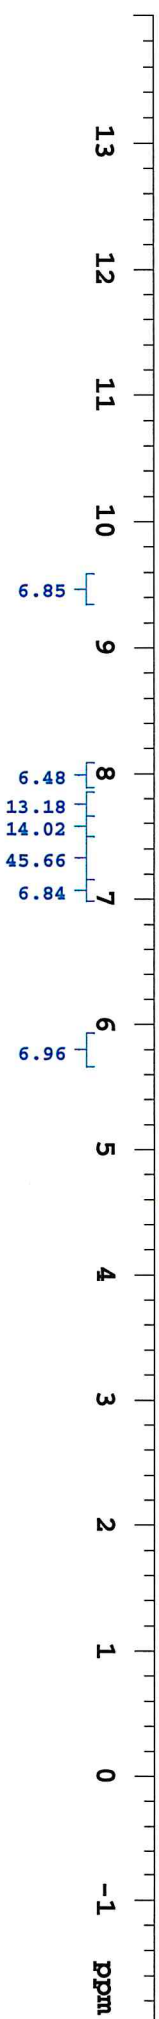

4b

Gradient Shimming

Sample Name:

AA948A

Data Collected on:

m300-mercury300

Archive directory:

/home/ammazza/vnmrSYS/data

Sample directory:

MF255\_20150422\_01

FidFile: AA948A\_C13

Pulse Sequence: CARBON (s2p1)

Solvent: cdcl3

Data collected on: Sep 28 2020

Operator: ammazza

Relax. delay 1.000 sec

Pulse 45.0 degrees

Acq. time 0.868 sec

Width 18867.9 Hz

1080 repetitions

OBSERVE C13, 75.4847602 MHz

DECOUPLE H1, 300.1991980 MHz

Power 38 dB

continuously on

WALTZ-16 modulated

DATA PROCESSING

Line broadening 0.5 Hz

FT size 32768

Total time 16 hr, 6 min

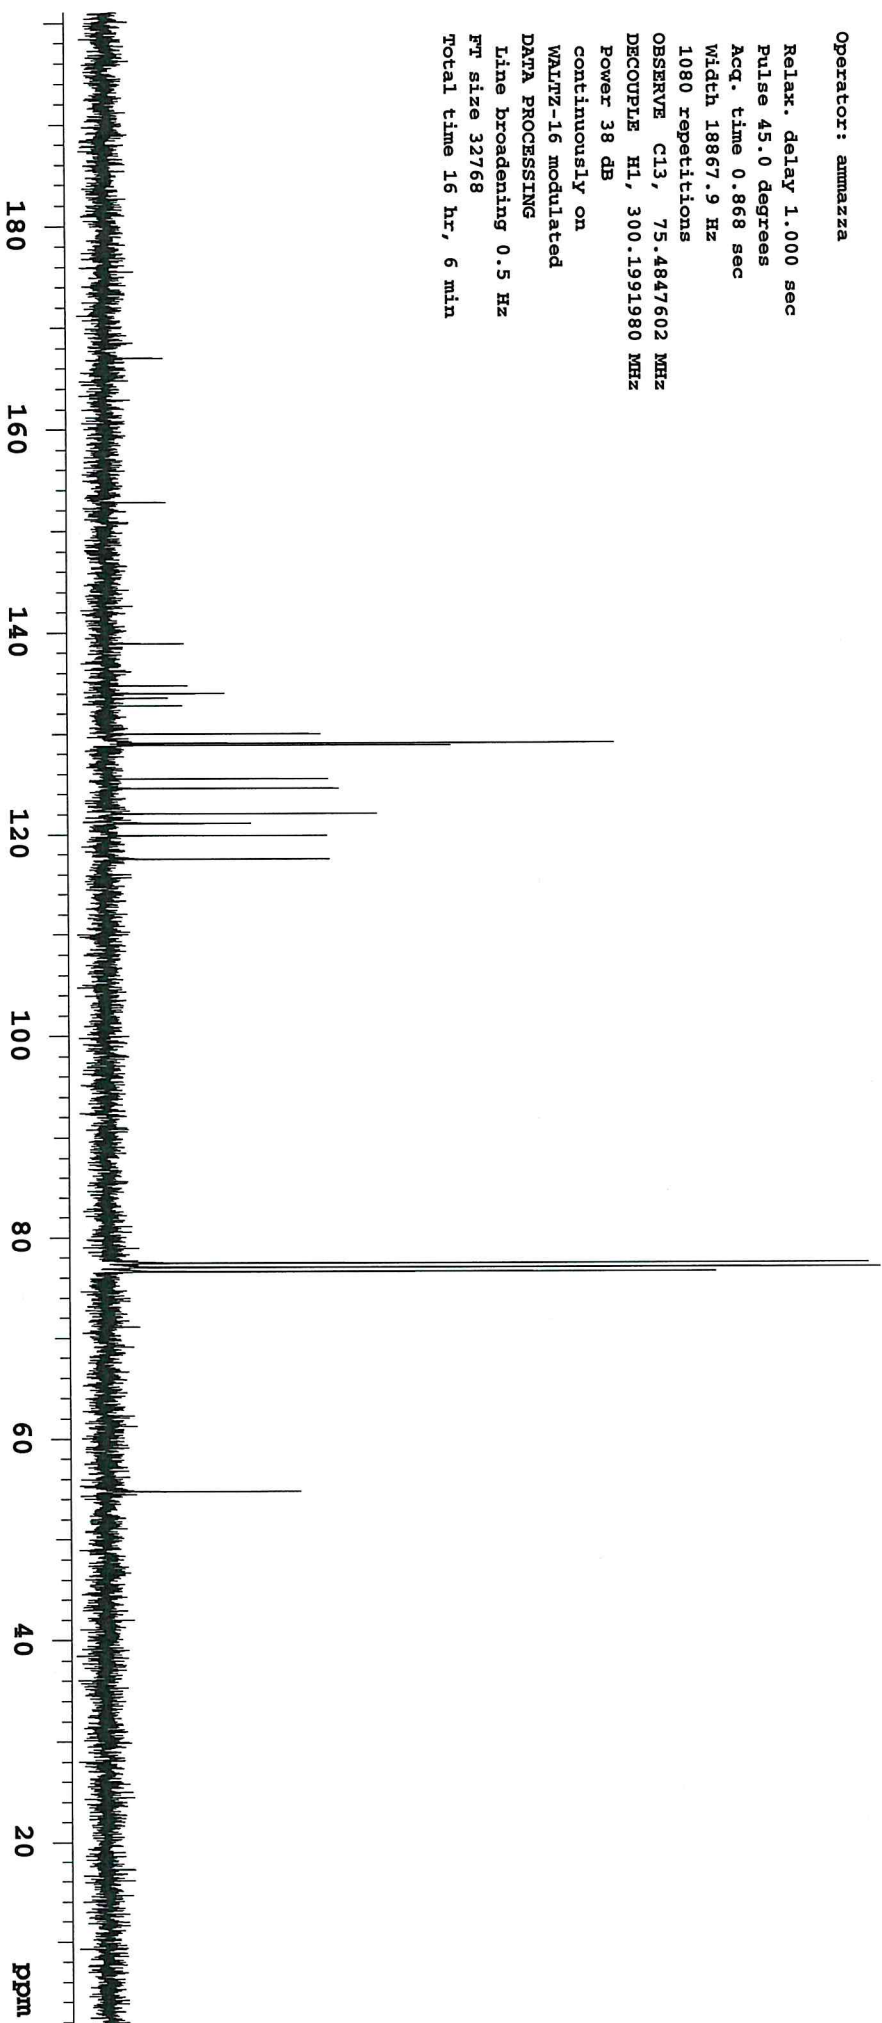

Gradient Shimming

Sample Name:

AA701A

Data Collected on:

m300-mercury300

Archive directory:

/export/home/chempack/vnmr/sys/data

Sample directory:

Fidfile: AA701A

Pulse Sequence: PROTON (s2pul)

Solvent: cdcl3

Data collected on: Nov 19 2015

Temp. 18.0 C / 291.1 K

Operator: ammazza

Relax. delay 1.000 sec

Pulse 45.0 degrees

Acq. time 1.706 sec

Width 4803.1 Hz

16 repetitions

OBSERVE H1, 300.1976543 MHz

DATA PROCESSING

FT size 16384

Total time 0 min 45 sec

4C

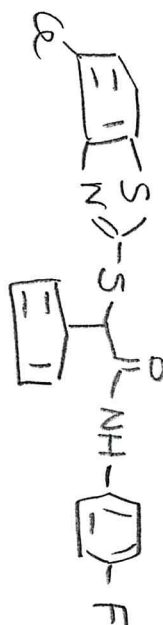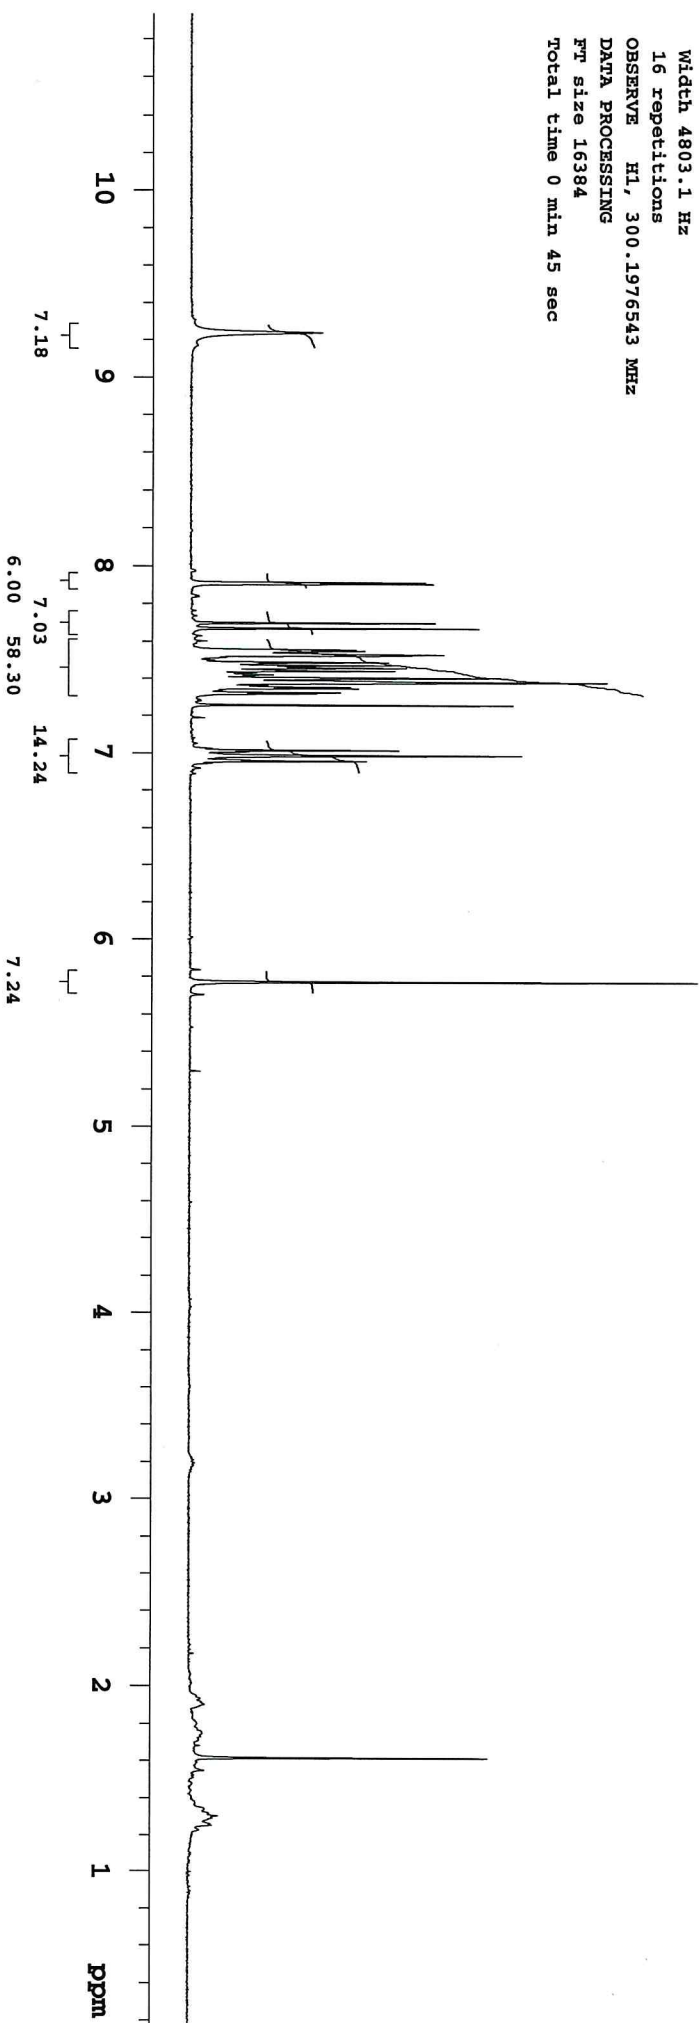

Gradient Shimming

Sample Name:

AA701A

Data Collected on:

m300-mercury300

Archive directory:

/export/home/chempack/vnmr/sys/data

Sample directory:

Fidfile: CARBON

Pulse Sequence: CARBON (s2pul)

Solvent: cdcl3

Data collected on: Nov 19 2015

Temp. 20.7 C / 293.9 K

Operator: ammazza

Relax. delay 1.000 sec

Pulse 45.0 degrees

Acq. time 0.868 sec

Width 18867.9 Hz

640 repetitions

OBSERVE C13, 75.4847602 MHz

DECOUPLE H1, 300.1991980 MHz

Power 38 dB

continuously on

WALTZ-16 modulated

DATA PROCESSING

Line broadening 0.5 Hz

FT size 32768

Total time 1 hr, 36 min

4c

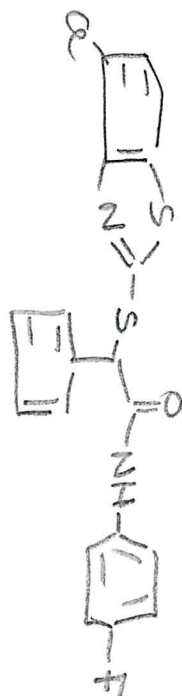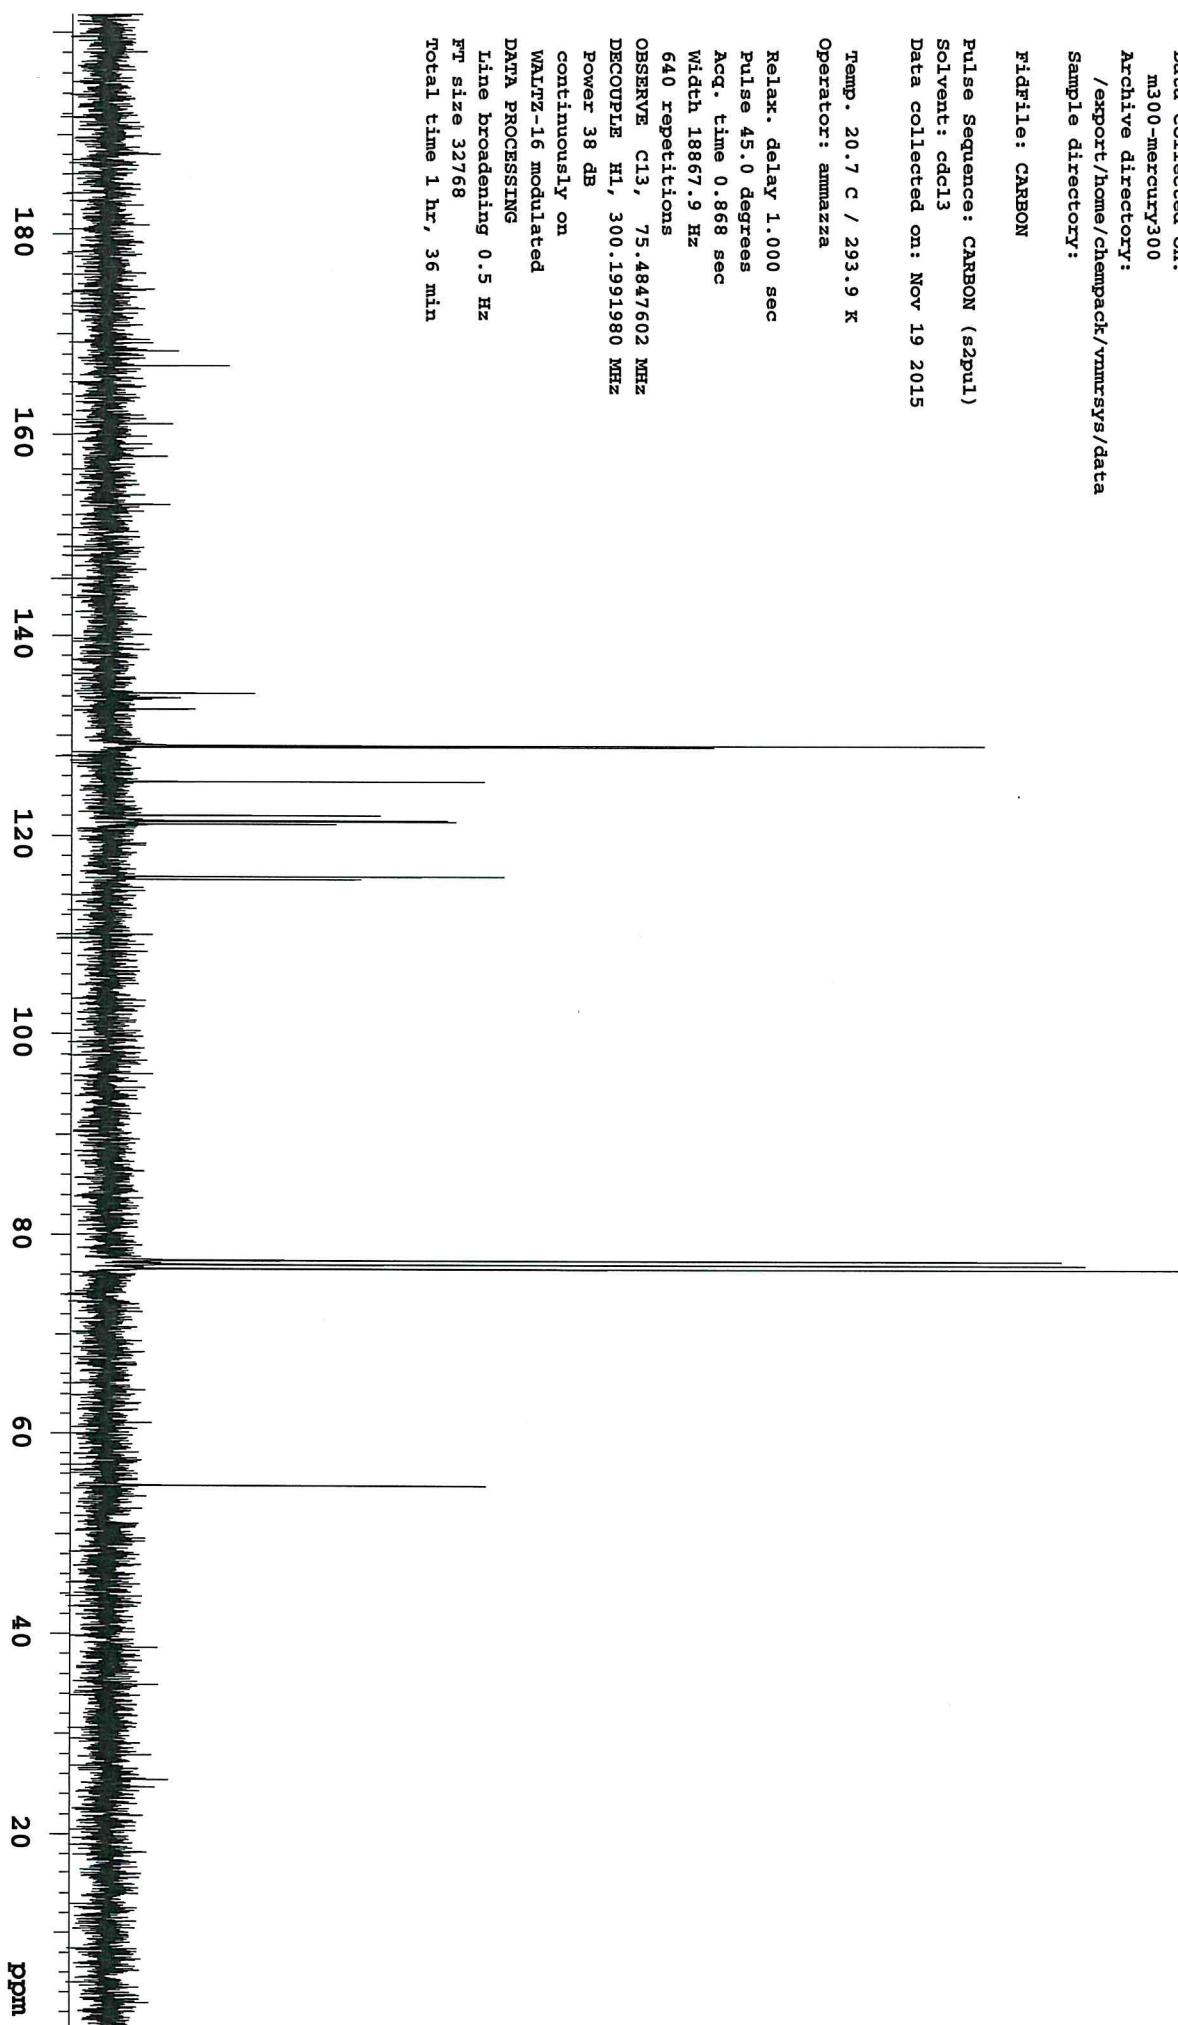

Gradient Shimming

Sample Name:  
AA955A

Data Collected on:  
m300-mercury300

Archive directory:  
/home/ammazza/vnmrSYS/data

Sample directory:  
MF255\_20150422\_01

Fidfile: AA955A

Pulse Sequence: PROTON (s2pu1)

Solvent: cdcl3

Data collected on: Nov 11 2020

Operator: ammazza

Relax. delay 1.000 sec

Pulse 45.0 degrees

Acq. time 1.706 sec

Width 4803.1 Hz

16 repetitions

OBSERVE H1, 300.1976543 MHz

DATA PROCESSING

FT size 16384

Total time 0 min 45 sec

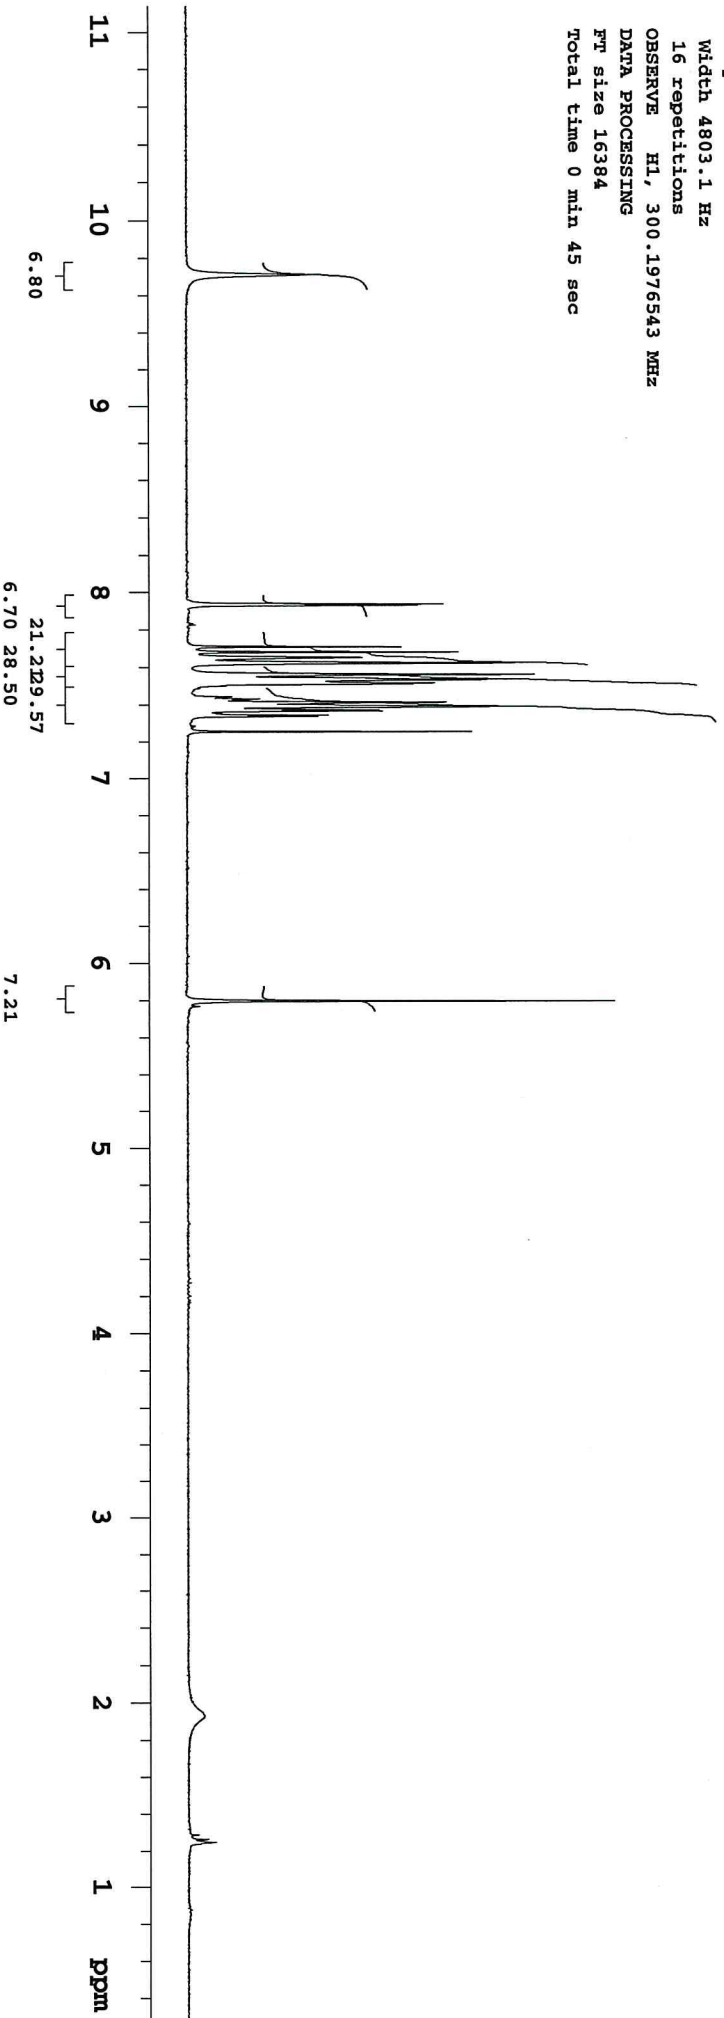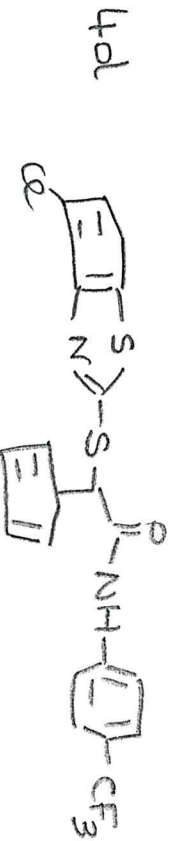

4d

# Gradient Shimming

Sample Name:

AA955A

Data Collected on:

m300-mercury300

Archive directory:

/home/ammazza/vnmrSYS/data

Sample directory:

MF255\_20150422\_01

Fidfile: CARBON

Pulse Sequence: CARBON (s2pul)

Solvent: cdc13

Data collected on: Nov 11 2020

Temp. 17.6 C / 290.8 K

Operator: ammazza

Relax. delay 1.000 sec

Pulse 45.0 degrees

Acq. time 0.868 sec

Width 18867.9 Hz

2688 repetitions

OBSERVE C13, 75.4847602 MHz

DECOUPLE H1, 300.1991980 MHz

Power 38 dB

continuously on

WALTZ-16 modulated

DATA PROCESSING

line broadening 0.5 Hz

FT size 32768

Total time 2 hr, 8 min

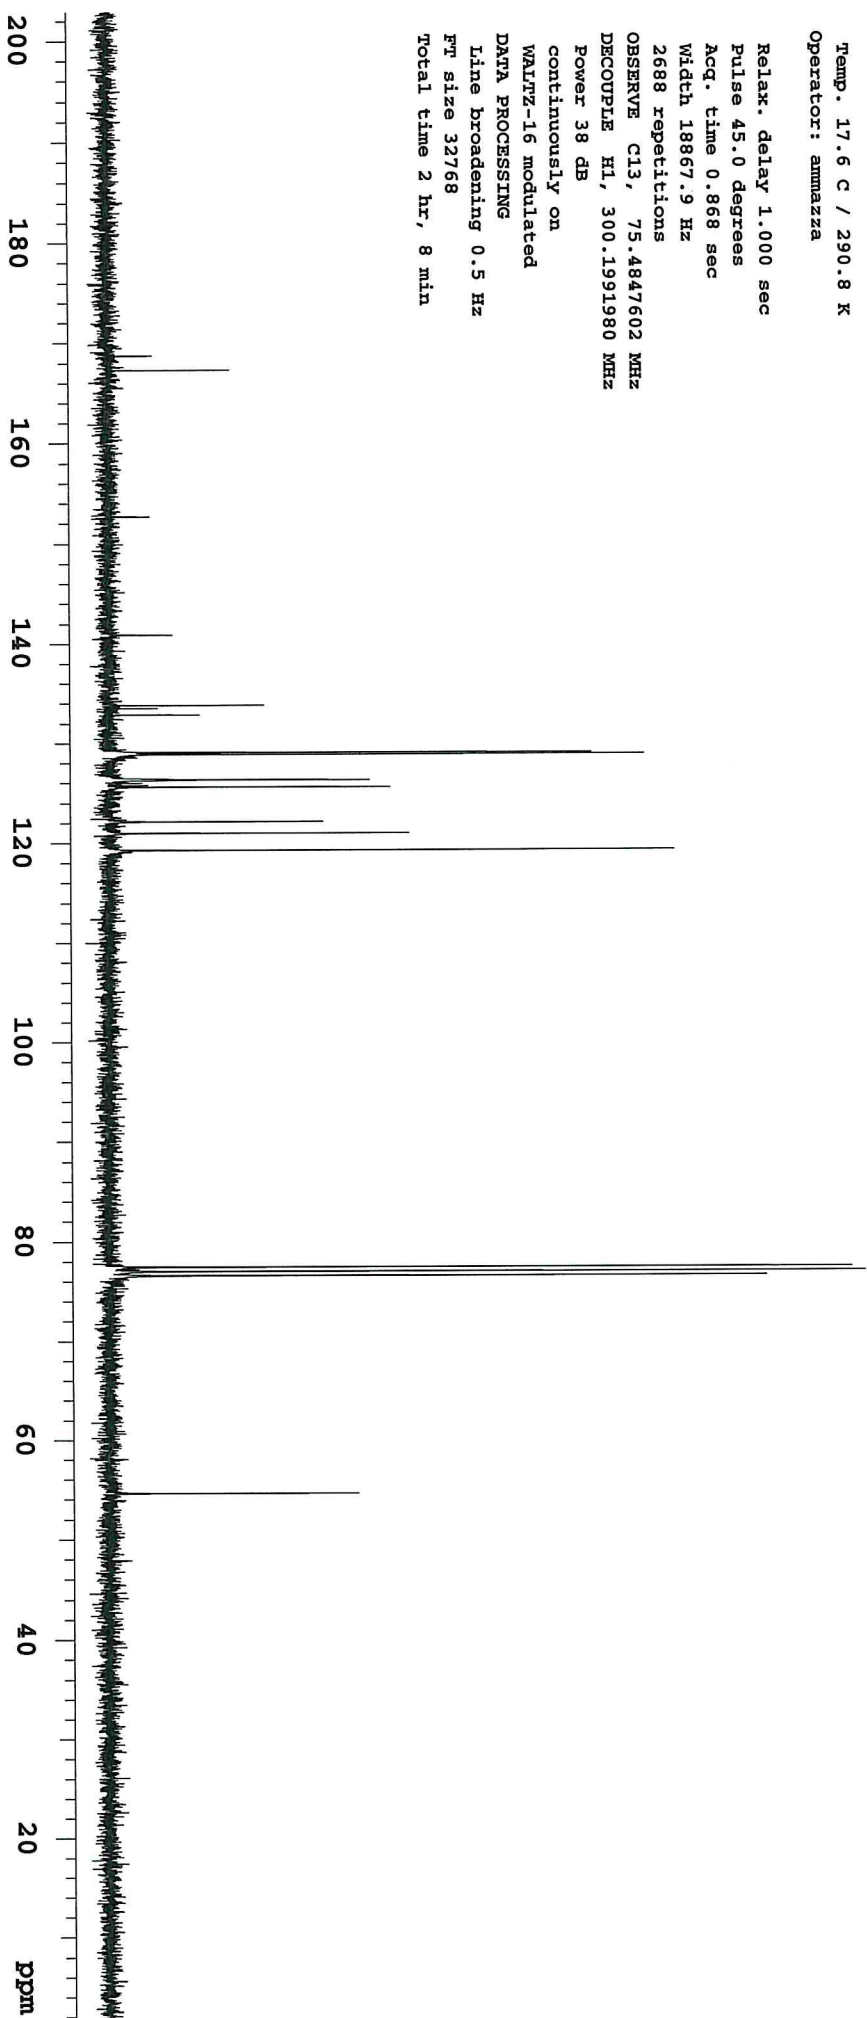



## Gradient Shimming

**Sample Name:**

AA952A

**Data Collected on:**

m300-mercury300

**Archive directory:**

/home/annmaza/vnmrsys/data

**Sample directory:**

ME255\_20150422\_01

**FidFile: AA952A**

Pulse Sequence: PROTON (s2pul)

Solvent: cdcl3

Data collected on: Oct 7 2020

**Operator:** ammaza

Relax. delay 1.000 sec

Pulse 45.0 degrees

Acq. time 1.706 sec

Width 4803.1 Hz

16 repetitions

OBSERVE H1, 300.1976543 MHZ

## DATA PROCESSING

FT size 16384

Total time 0 min 45 sec

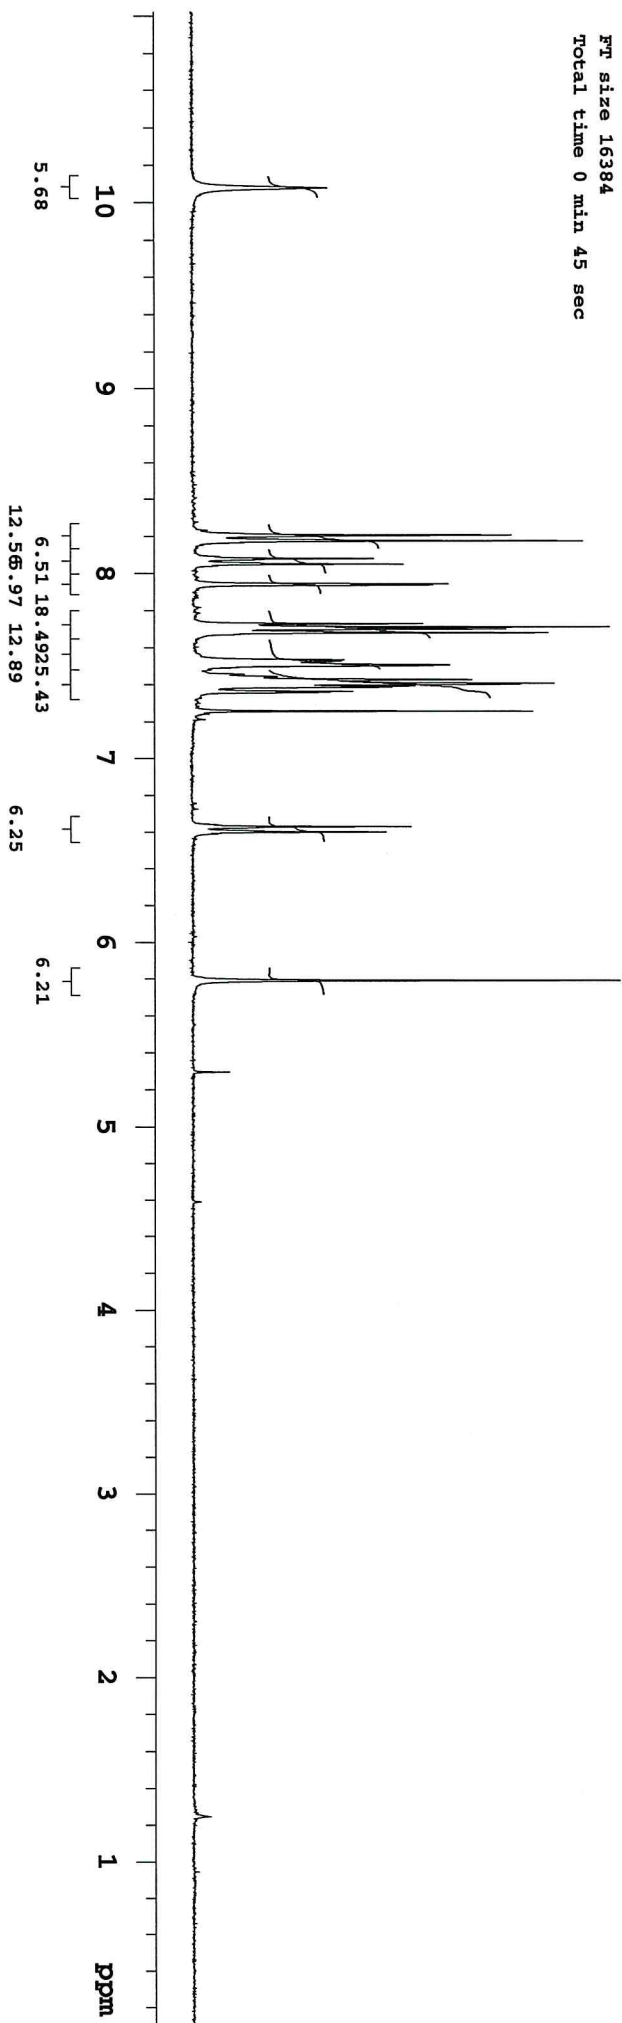

Le

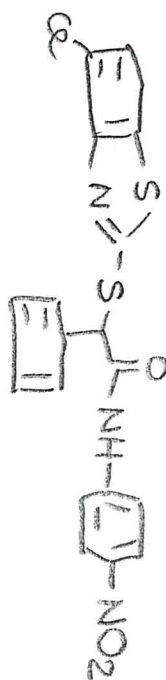

4c

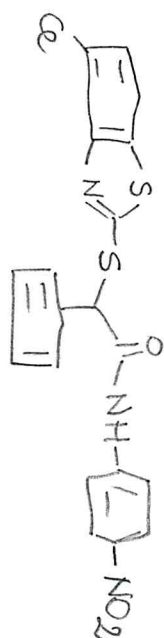

# Gradient Shimming

Sample Name:

AA952A

Data Collected on:

m300-mercury300

Archive directory:

/home/ammazza/vnmrSYS/data

Sample directory:

MF255\_20150422\_01

FidFile: CARBON

Pulse Sequence: CARBON (s2pu1)

Solvent: cdcl3

Data collected on: Oct 8 2020

Temp. 18.7 C / 291.9 K

Operator: ammazza

Relax. delay 1.000 sec

Pulse 45.0 degrees

Acq. time 0.868 sec

Width 18867.9 Hz

4032 repetitions

OBSERVE C13, 75.4847602 MHz

DECOUPLE H1, 300.1991980 MHz

Power 38 dB

continuously on

WALTZ-16 modulated

DATA PROCESSING

Line broadening 0.5 Hz

FT size 32768

Total time 3 hr, 13 min

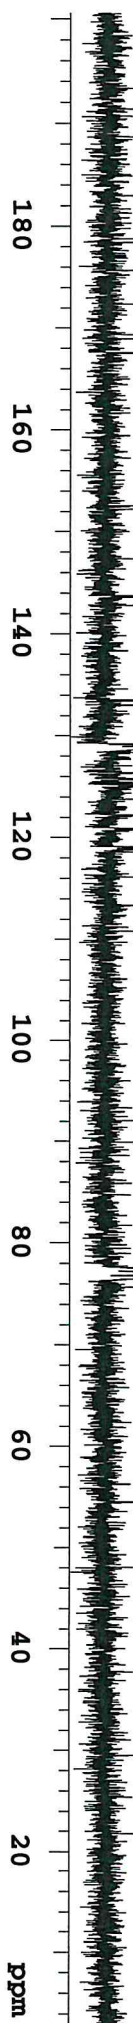

Gradient Shimming

Sample Name:

AA675ppt

Data Collected on:

m300-mercury300

Archive directory:

/export/home/chempack/vnmrsys/data

Sample directory:

FidFile: AA675ppt

Pulse Sequence: PROTON (s2pu1)

Solvent: dmsd

Data collected on: Oct 27 2014

Operator: ammazza

Relax. delay 1.000 sec

Pulse 45.0 degrees

Acq. time 1.706 sec

Width 4803.1 Hz

16 repetitions

OBSERVE H1, 300.1990802 MHz

DATA PROCESSING

FT size 16384

Total time 0 min 45 sec

4f

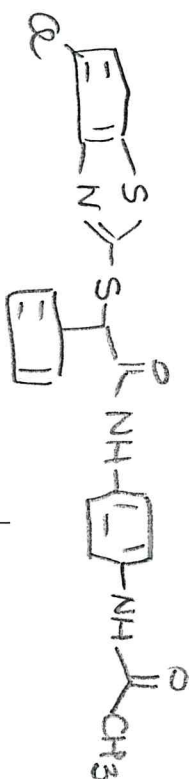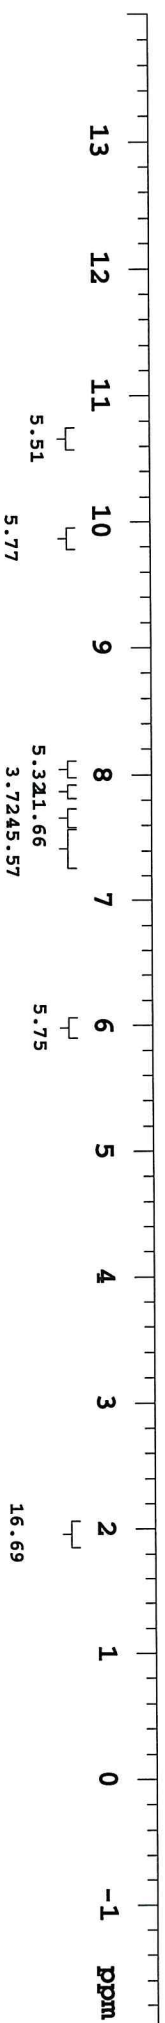

Gradient Shimming

Sample Name:

AA675ppt

Data Collected on:

m300-mercury300

Archive directory:

/export/home/chempack/vnmrSYS/data

Sample directory:

Fidfile: CARBON

Pulse Sequence: CARBON (s2pul)

Solvent: dmsc

Data collected on: Oct 27 2014

Temp. 20.1 C / 293.2 K

Operator: ammaza

Relax. delay 1.000 sec

Pulse 45.0 degrees

Acq. time 0.868 sec

Width 18867.9 Hz

576 repetitions

OBSERVE C13, 75.485118 MHz

DECOUPLE H1, 300.206240 MHz

Power 38 dB

continuously on

WALTZ-16 modulated

DATA PROCESSING

Line broadening 0.5 Hz

FT size 32768

Total time 1 hr, 4 min

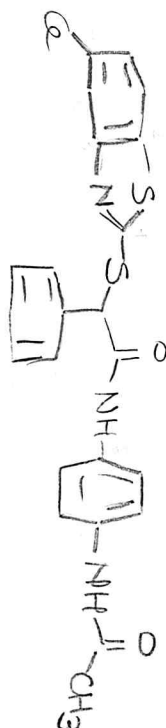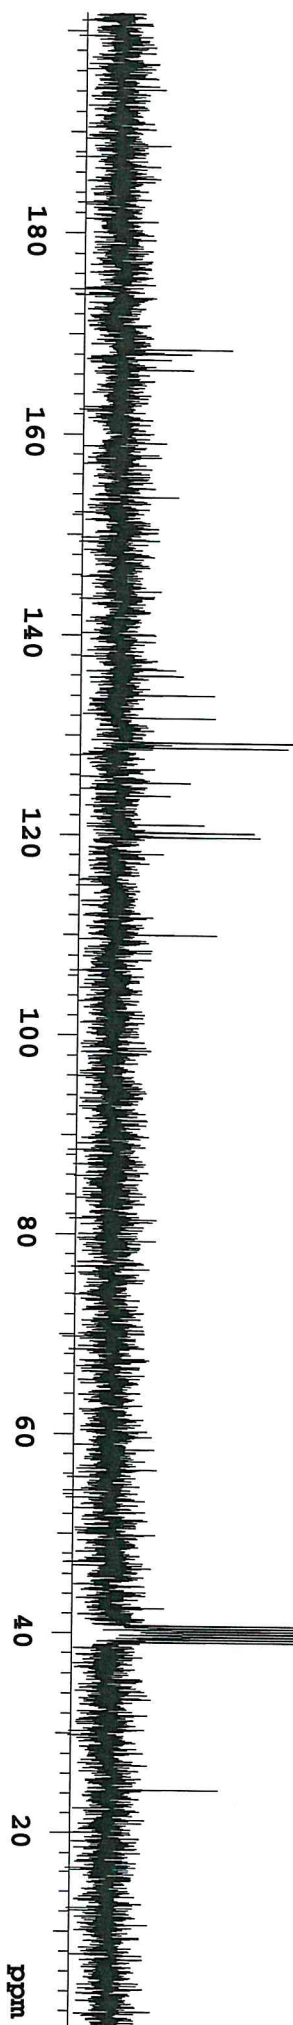

Gradient Shimming

Sample Name:

AA1009A

Data Collected on:

m300-mercury300

Archive directory:

/home/ammazza/vnmrSYS/data

Sample directory:

AA1008A\_20210409\_01

FidFile: AA1009A

Pulse Sequence: PROTON (s2pu1)

Solvent: cdcl3

Data collected on: Apr 9 2021

Operator: ammazza

Relax. delay 1.000 sec

Pulse 45.0 degrees

Acq. time 1.706 sec

Width 4803.1 Hz

16 repetitions

OBSERVE H1, 300.1976543 MHz

DATA PROCESSING

FT size 16384

Total time 0 min 45 sec

4g

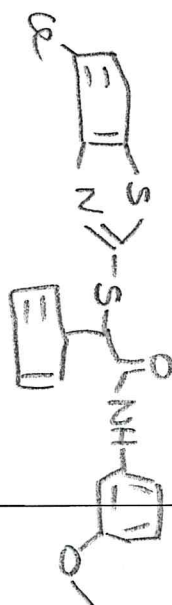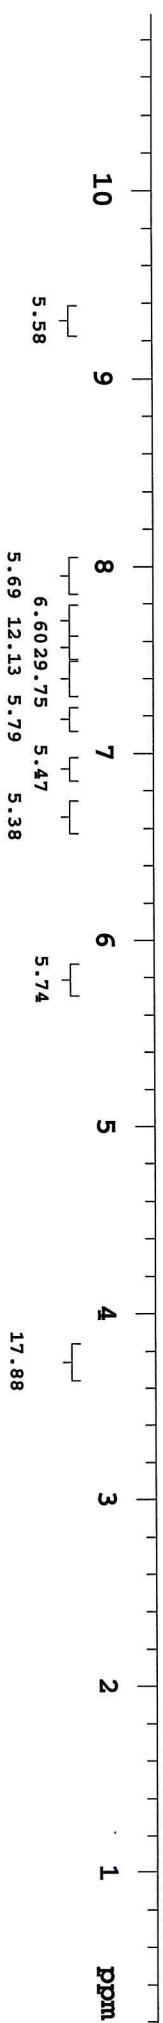

Gradient Shimming

Sample Name:

AA1009A

Data Collected on:

m30-mercury300

Archive directory:

/home/ammazza/vnmrSYS/data

Sample directory:

AA1008A\_20210409\_01

FidFile: CARBON

Pulse Sequence: CARBON (s2pul)

Solvent: cdcl3

Data collected on: Apr 13 2021

Temp. 17.6 C / 290.8 K

Operator: ammazza

Relax. delay 1.000 sec

Pulse 45.0 degrees

Acq. time 0.868 sec

Width 18867.9 Hz

3520 repetitions

OBSERVE C13, 75.4847602 MHz

DECOUPLE H1, 300.1991980 MHz

Power 38 dB

continuously on

WALTZ-16 modulated

DATA PROCESSING

Line broadening 0.5 Hz

FT size 32768

Total time 2 hr, 8 min

498

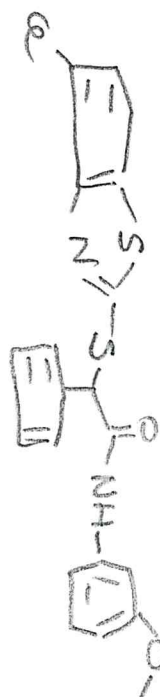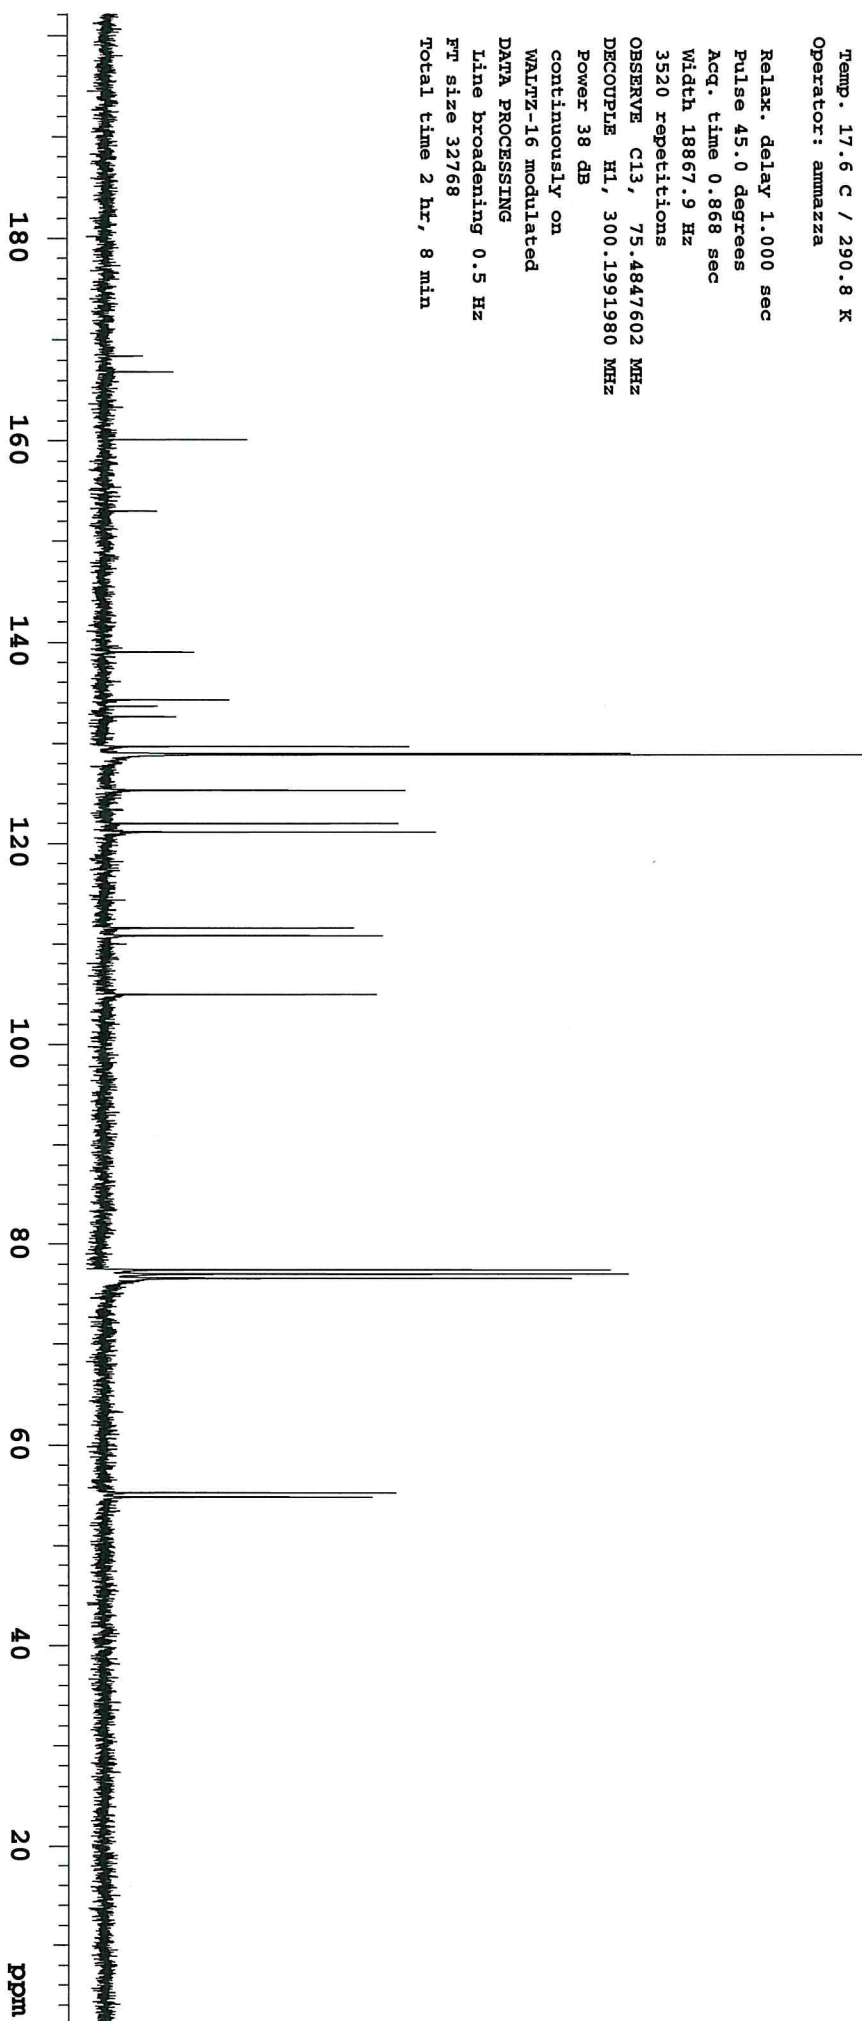

Gradient Shimming

Sample Name:

AA948A

Data collected on:

m300-mercury300

Archive directory:

/home/ammazza/vnmrsws/data

Sample directory:

MF255\_20150422\_01

Fidfile: AA948A

Pulse Sequence: PROTON (szpul)

Solvent: cdcl3

Data collected on: Sep 28 2020

Operator: ammazza

Relax. delay 1.000 sec

Pulse 45.0 degrees

Acq. time 1.706 sec

Width 4803.1 Hz

16 repetitions

OBSERVE H1, 300.1976543 MHz

DATA PROCESSING

FT size 16384

Total time 0 min 45 sec

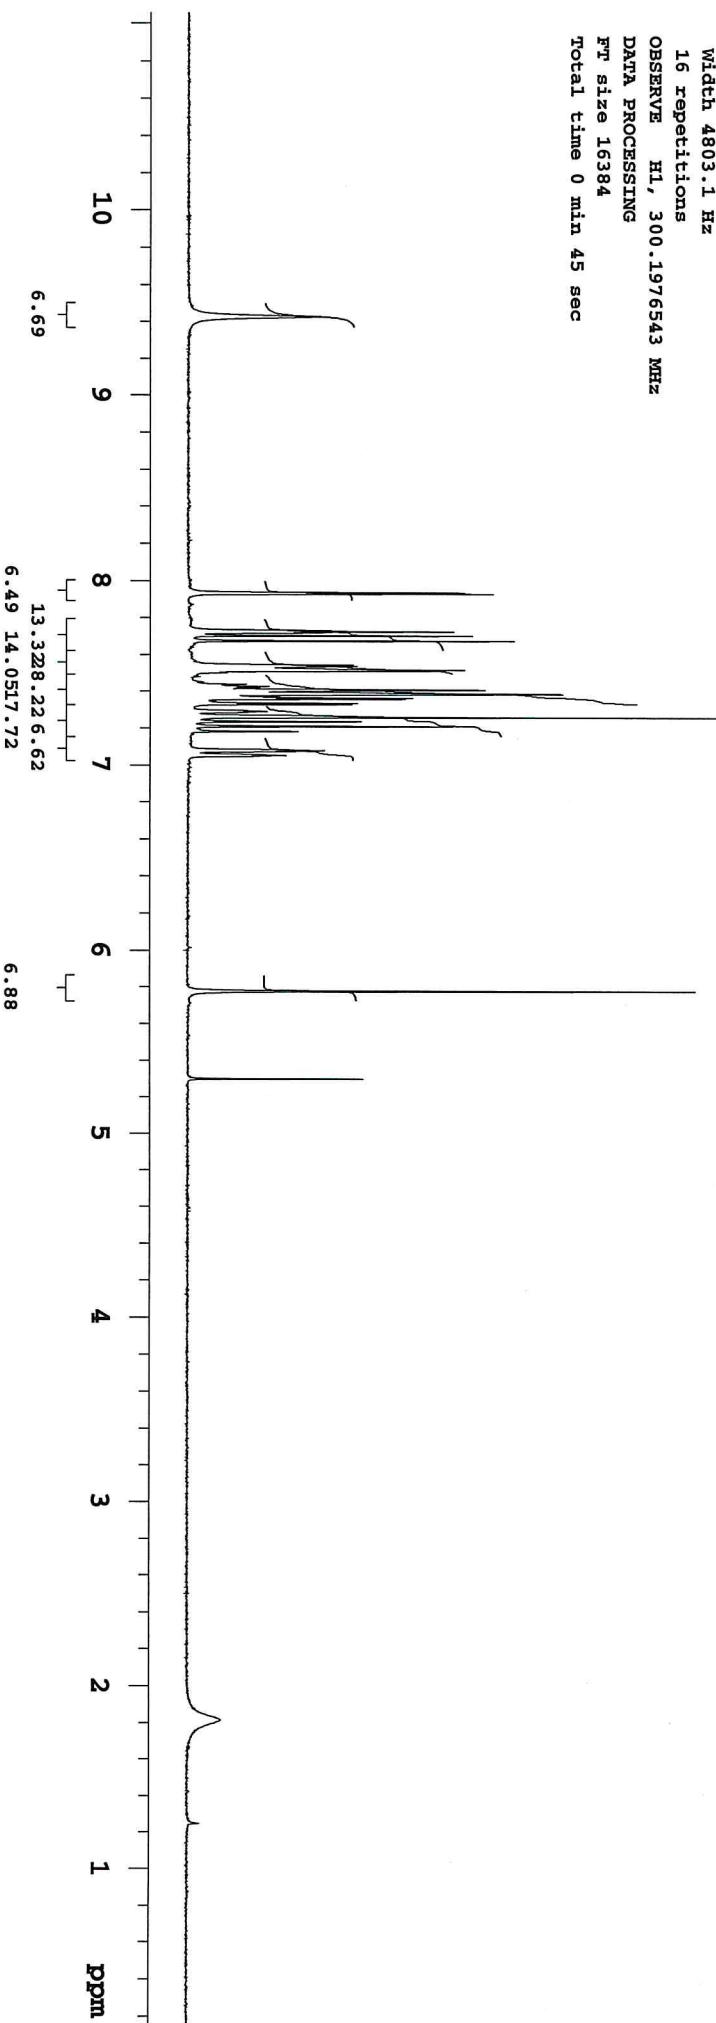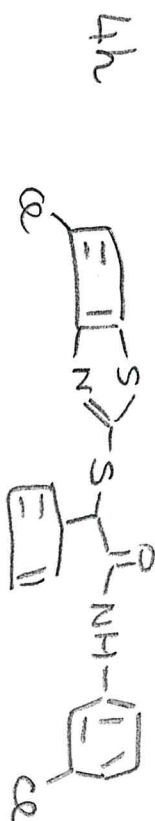



Gradient Shimming

Sample Name:

AA948A

Data Collected on:

m300-mercury300

Archive directory:

/home/ammazza/vnmrSYS/data

Sample directory:

MF255\_20150422\_01

Fidfile: CARBON

Pulse Sequence: CARBON (s2pul)

Solvent: cdcl3

Data collected on: Sep 28 2020

Temp. 18.6 C / 291.8 K

Operator: ammazza

Relax. delay 1.000 sec

Pulse 45.0 degrees

Acq. time 0.868 sec

Width 18867.9 Hz

1024 repetitions

OBSERVE C13, 75.4847602 MHz

DECOUPLE H1, 300.1991980 MHz

Power 38 dB

continuously on

WALTZ-16 modulated

DATA PROCESSING

Line broadening 0.5 Hz

FT size 32768

Total time 16 hr, 6 min

Lh

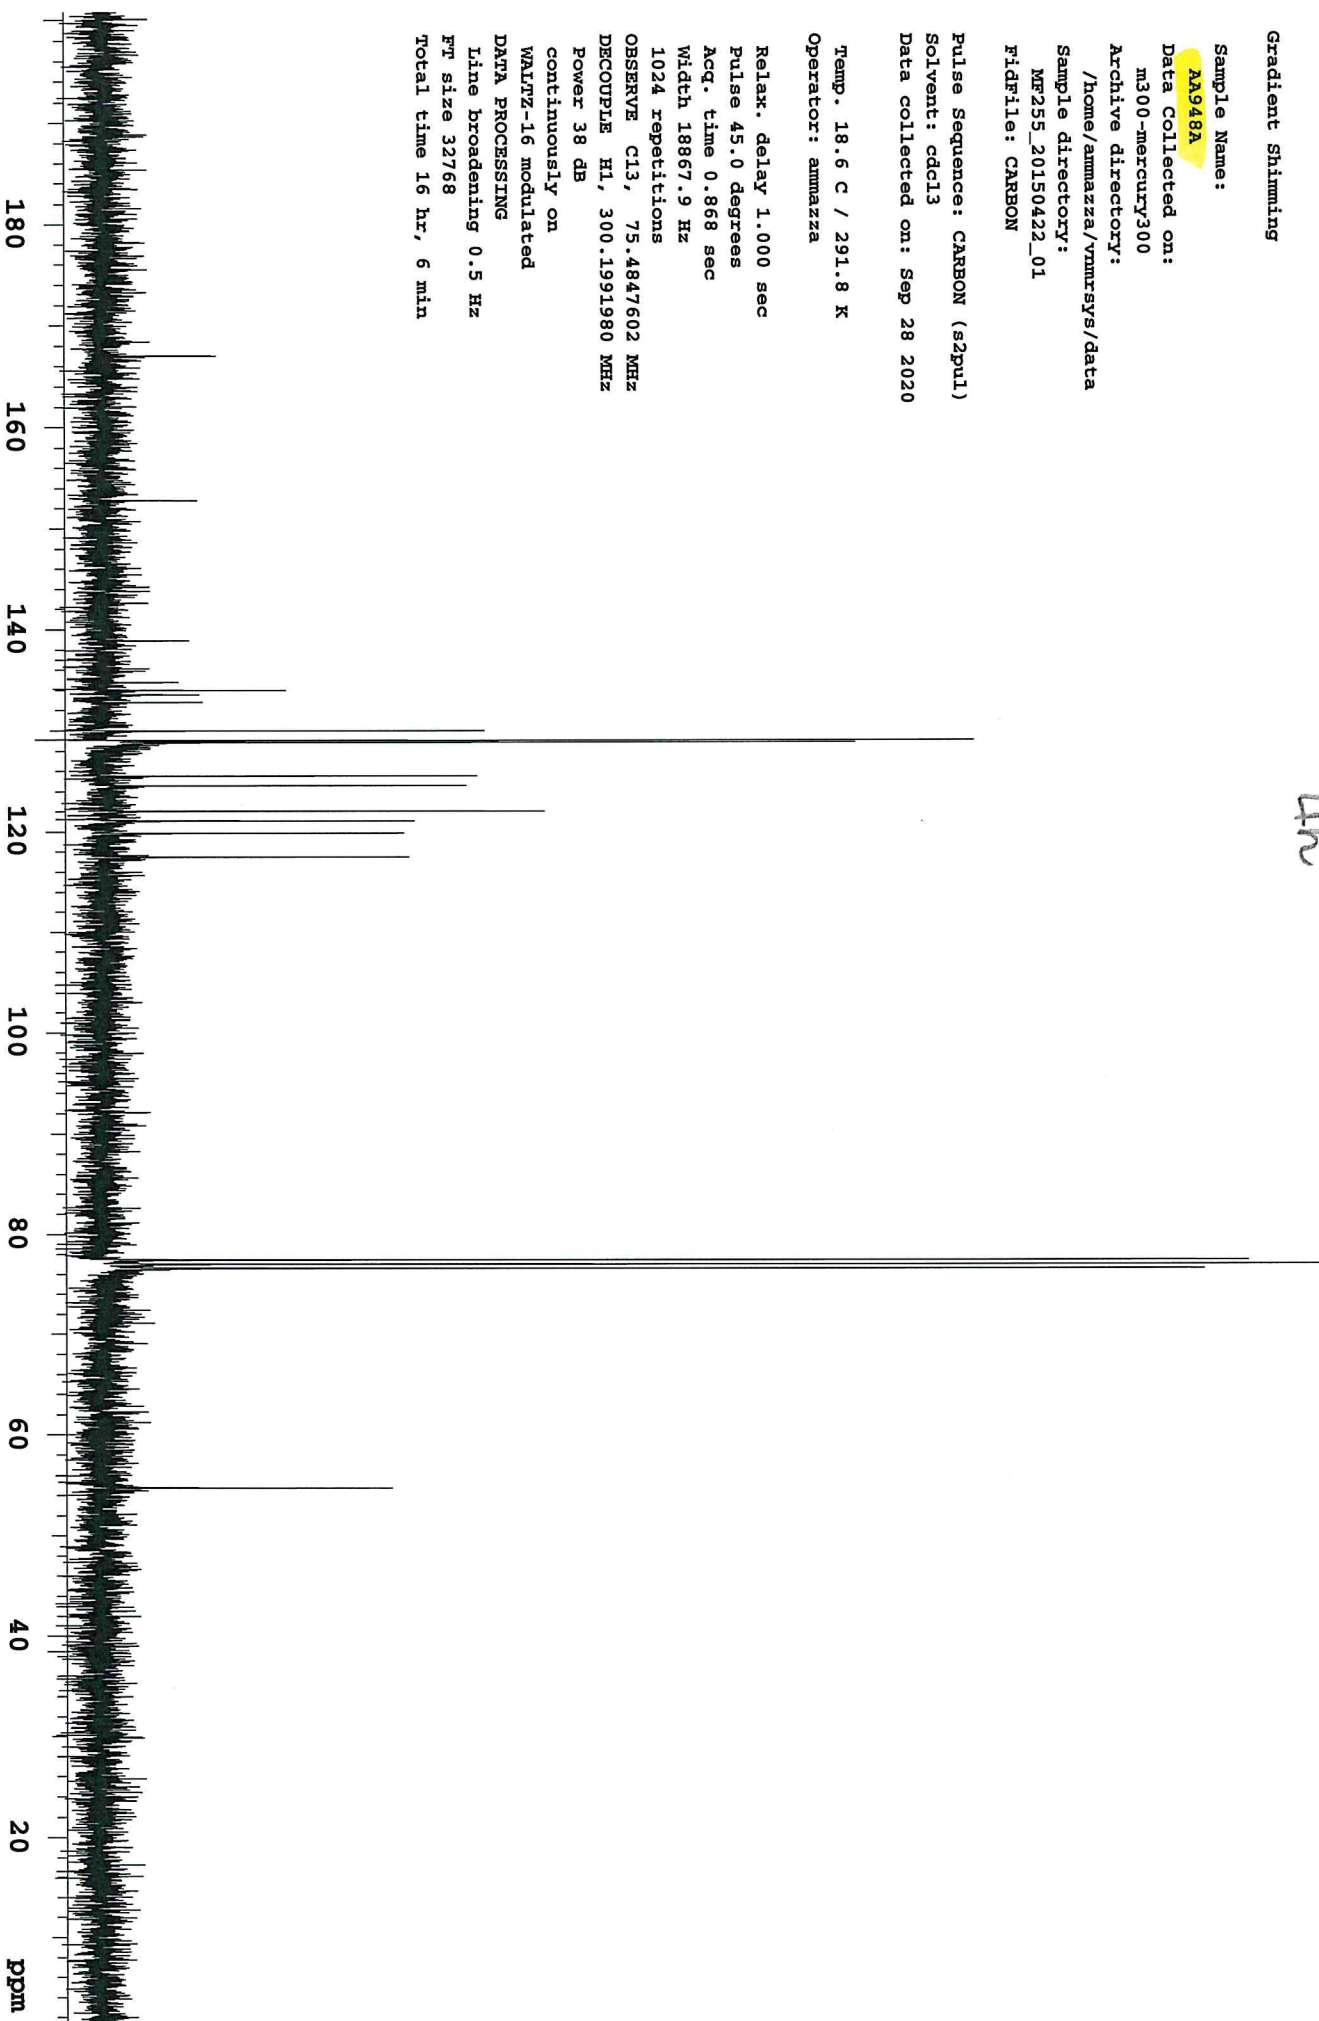



Gradient Shimming

Sample Name:

AA702B

Data Collected on:

m300-mercury300

Archive directory:

/export/home/chempack/vnmrSYS/data

Sample directory:

FidFile: AA702B

Pulse Sequence: PROTON (s2pul)

Solvent: cdcl3

Data collected on: Nov 19 2015

Temp. 18.0 C / 291.1 K

Operator: ammazza

Relax. delay 1.000 sec

Pulse 45.0 degrees

Acq. time 1.706 sec

Width 4803.1 Hz

16 repetitions

OBSERVE H1, 300.1976543 MHz

DATA PROCESSING

FT size 16384

Total time 0 min 45 sec

4i

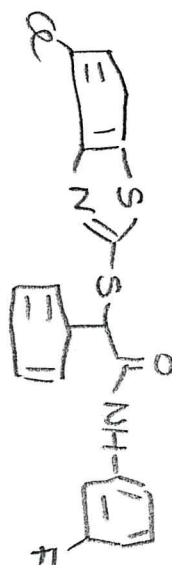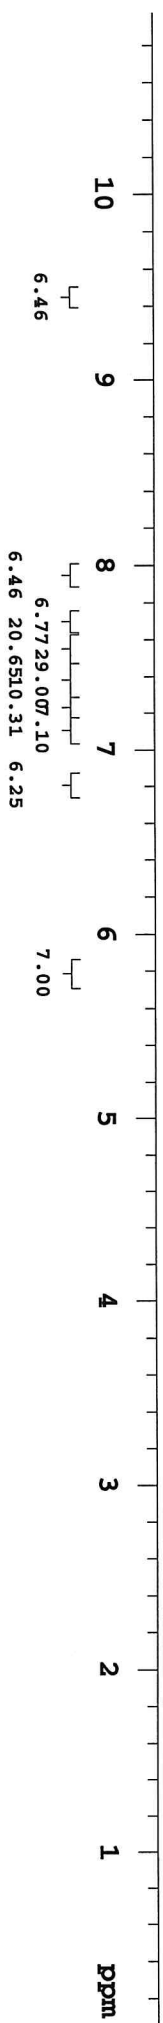

Gradient Shimming

Sample Name:

AA702A

Data Collected on:

m300-mercury300

Archive directory:

/export/home/chempack/vnmrSYS/data

Sample directory:

FidFile: CARBON

Pulse Sequence: CARBON (s2pul)

Solvent: cdcl3

Data collected on: Nov 19 2015

Temp. 20.7 C / 293.9 K

Operator: ammaza

Relax. delay 1.000 sec

Pulse 45.0 degrees

Acq. time 0.868 sec

Width 18867.9 Hz

192 repetitions

OBSERVE C13, 75.4847602 MHz

DECOUPLE H1, 300.1991980 MHz

Power 38 dB

continuously on

WALTZ-16 modulated

DATA PROCESSING

Line broadening 0.5 Hz

FT size 32768

Total time 1 hr, 36 min

4i

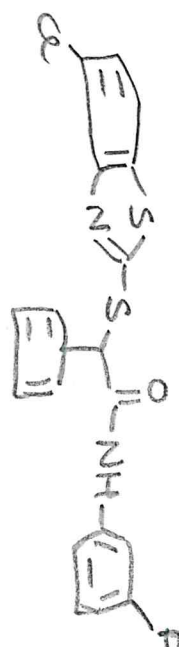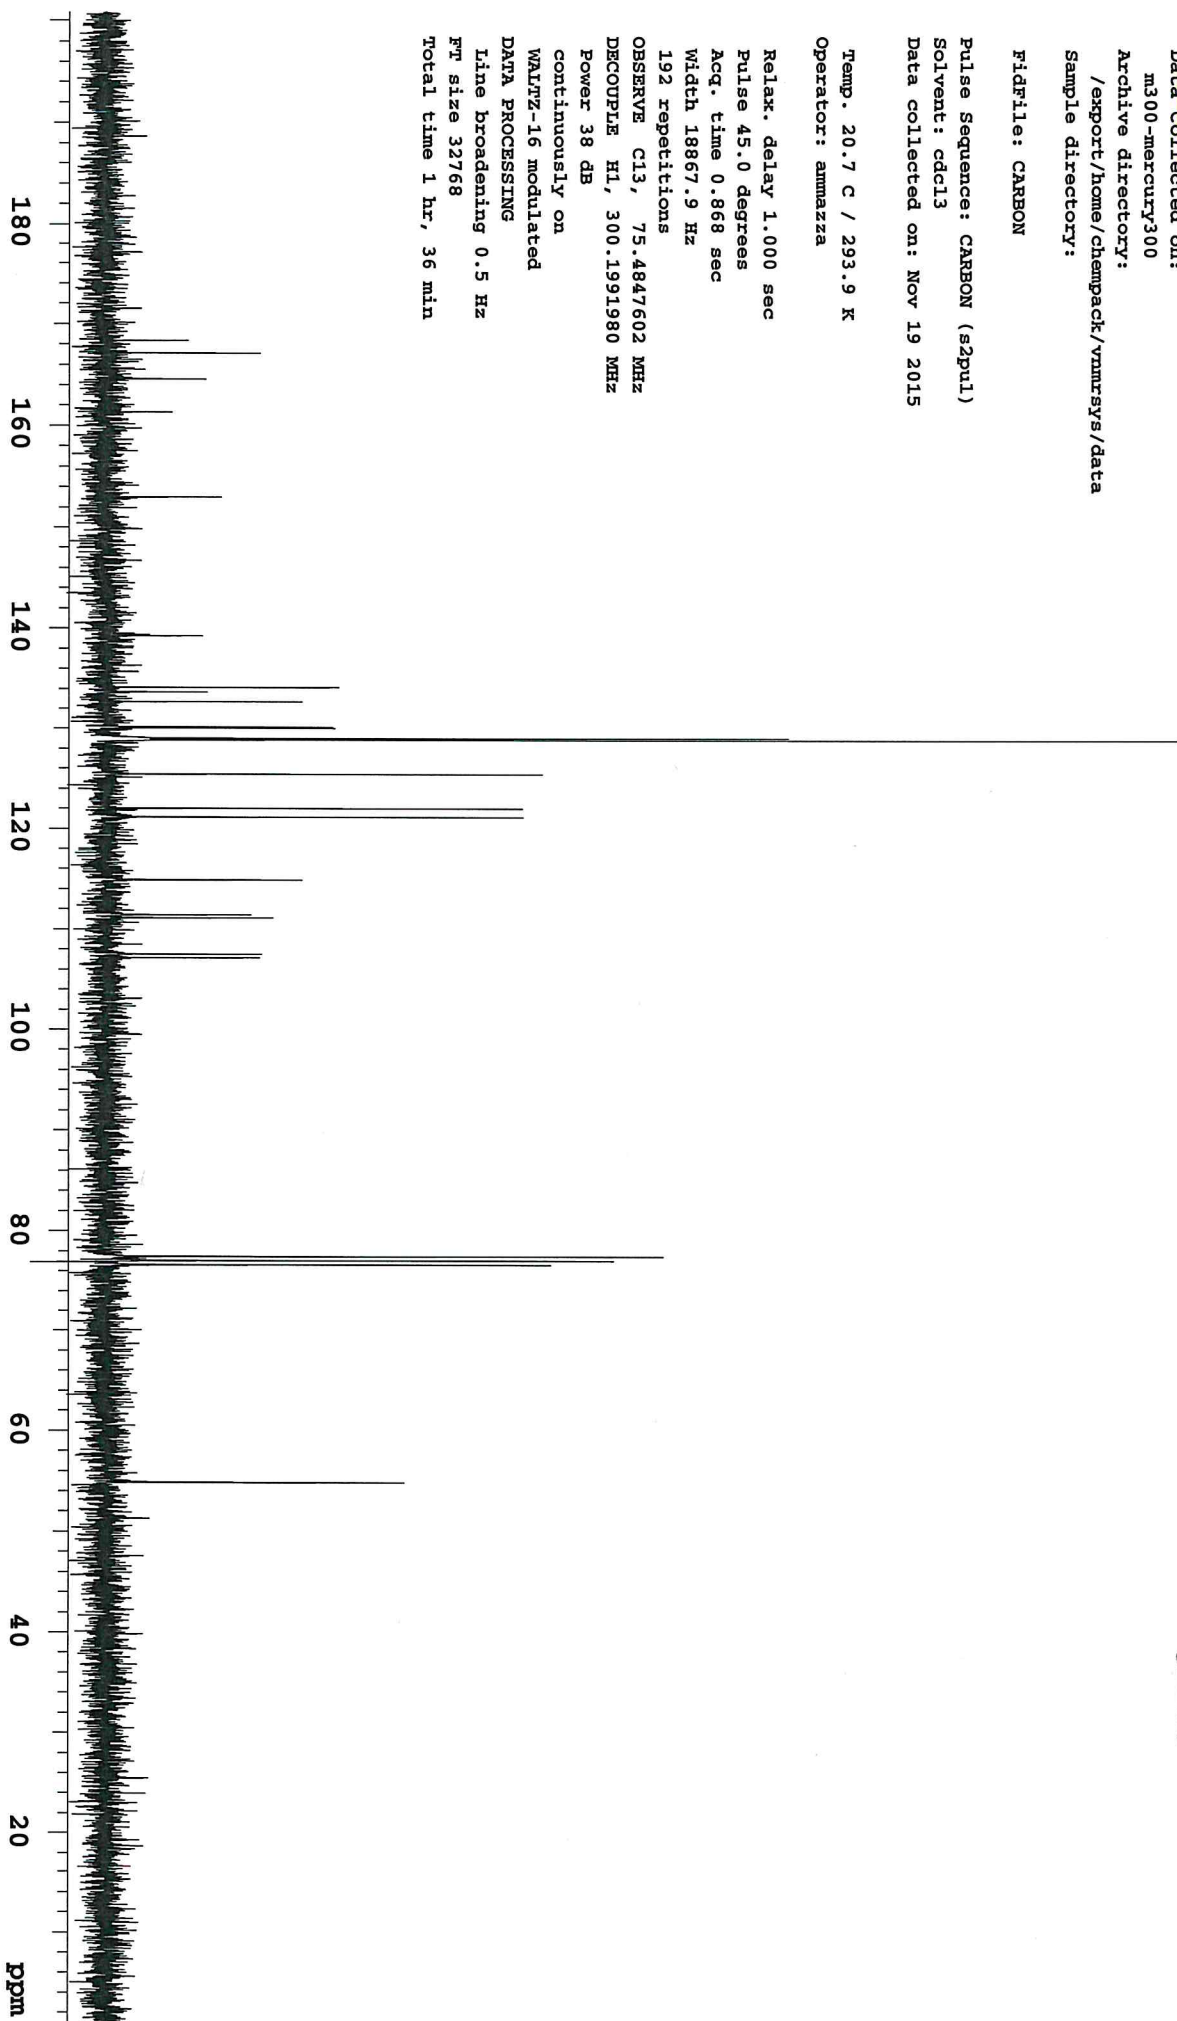

5

AA993B

m300-mercury3

/home/annazzz/vmr/sys/data

ME255\_20150422\_01

Pulse Sequence: PROTON (s2pul)

Data collected on: Mar 22 2021

**Operator: amnazza**

Pulse 45.0 deg

Width 4803.1 Hz

OBSERVE H1, 300.1976543 MHz

FT size 16384

Total time 0 min 45 sec

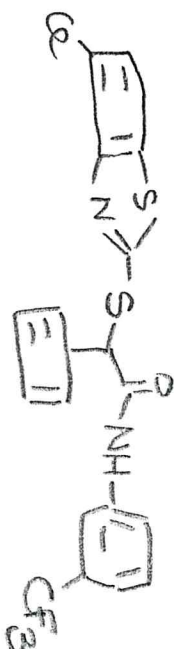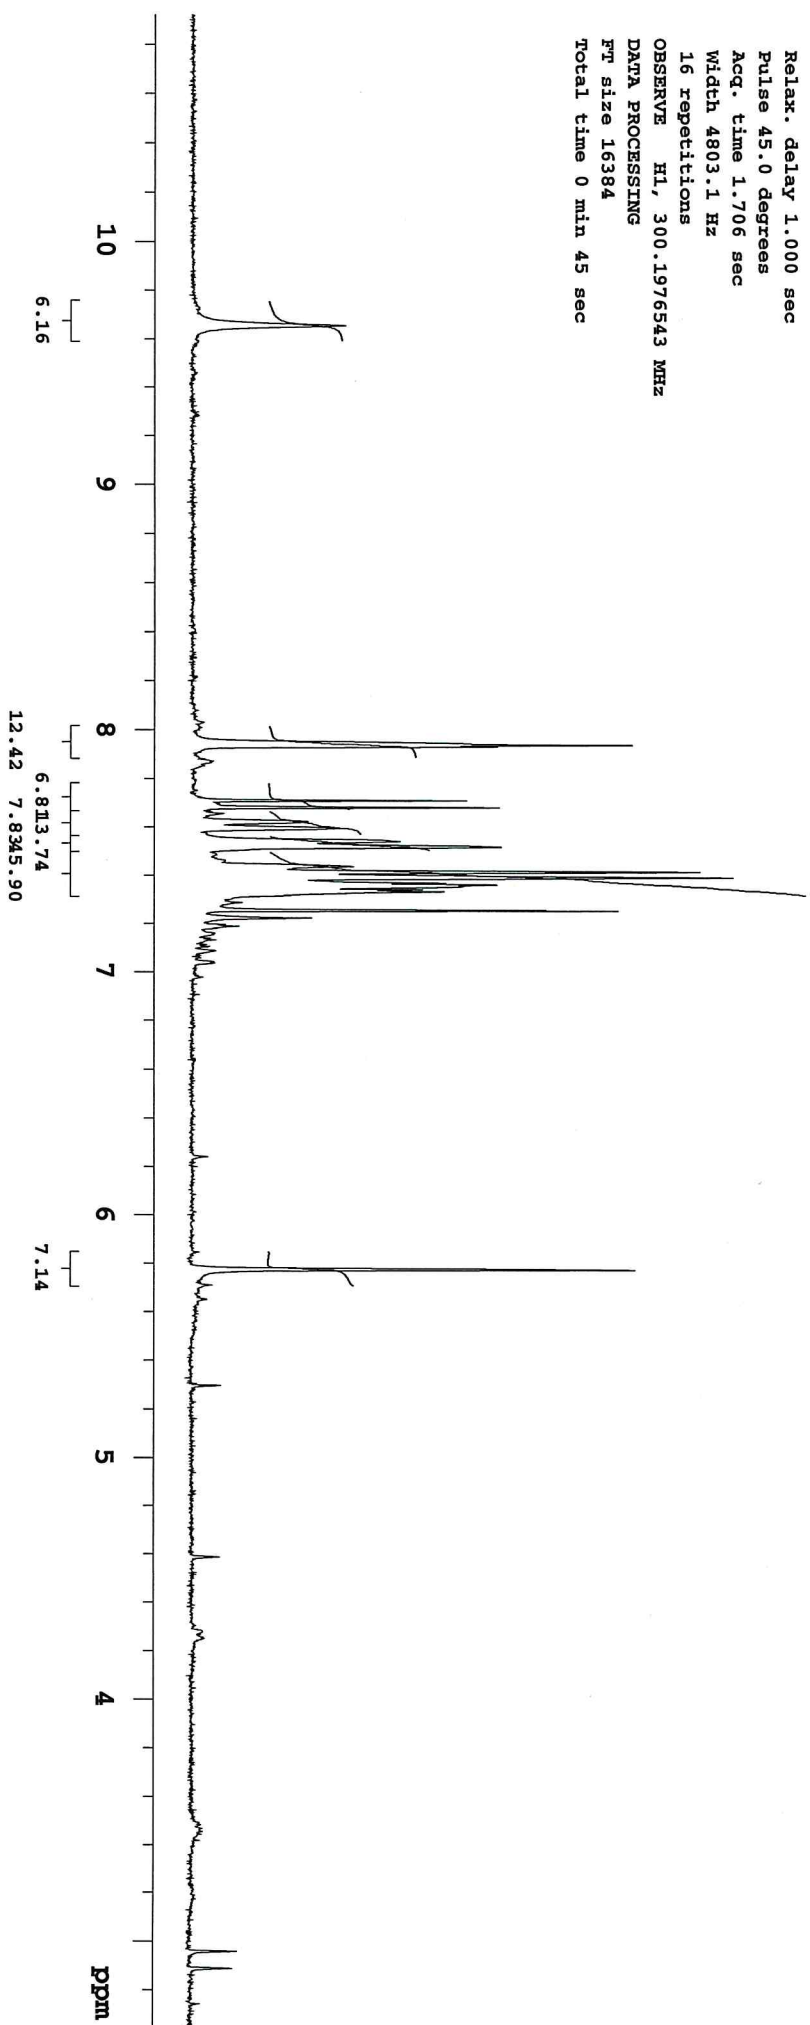

Gradient Shimming

Sample Name:

AA993B

Data Collected on:

m300-mercury300

Archive directory:

/home/ammazza/vnmrSYS/data

Sample directory:

AA1008A\_20210409\_01

FidFile: CARBON

Pulse Sequence: CARBON (szpul)

Solvent: cdcl3

Data collected on: Apr 15 2021

Temp. 18.2 C / 291.4 K

Operator: ammazza

Relax. delay 1.000 sec

Pulse 45.0 degrees

Acq. time 0.868 sec

Width 18867.9 Hz

31808 repetitions

OBSERVE C13, 75.4847602 MHz

DECOUPLE H1, 300.1991980 MHz

Power 38 dB

continuously on

WALTZ-16 modulated

DATA PROCESSING

Line broadening 0.5 Hz

FT size 32768

Total time 18 hr, 47 min

45

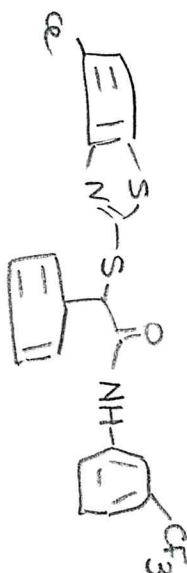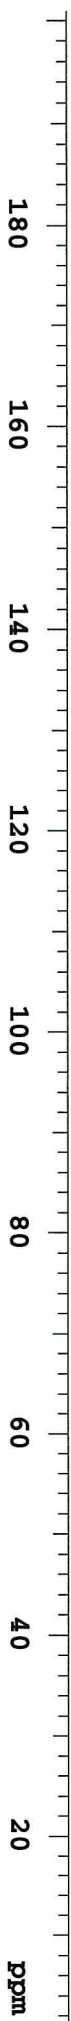

Gradient Shimming

Sample Name:

AA951A

Data Collected on:

m300-mercury300

Archive directory:

/home/ammaza/vnmrsws/data

Sample directory:

MF255\_20150422\_01

FidFile: AA951A

Pulse Sequence: PROTON (s2pul)

Solvent: cdcl3

Data collected on: Oct 7 2020

Operator: ammaza

Relax. delay 1.000 sec

Pulse 45.0 degrees

Acq. time 1.706 sec

Width 4803.1 Hz

16 repetitions

OBSERVE H1, 300.1976543 MHz

DATA PROCESSING

FT size 16384

Total time 0 min 45 sec

4K

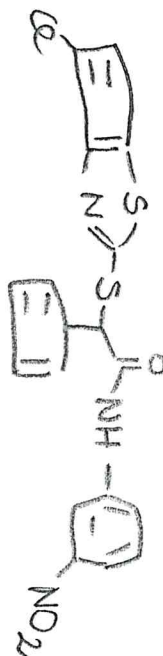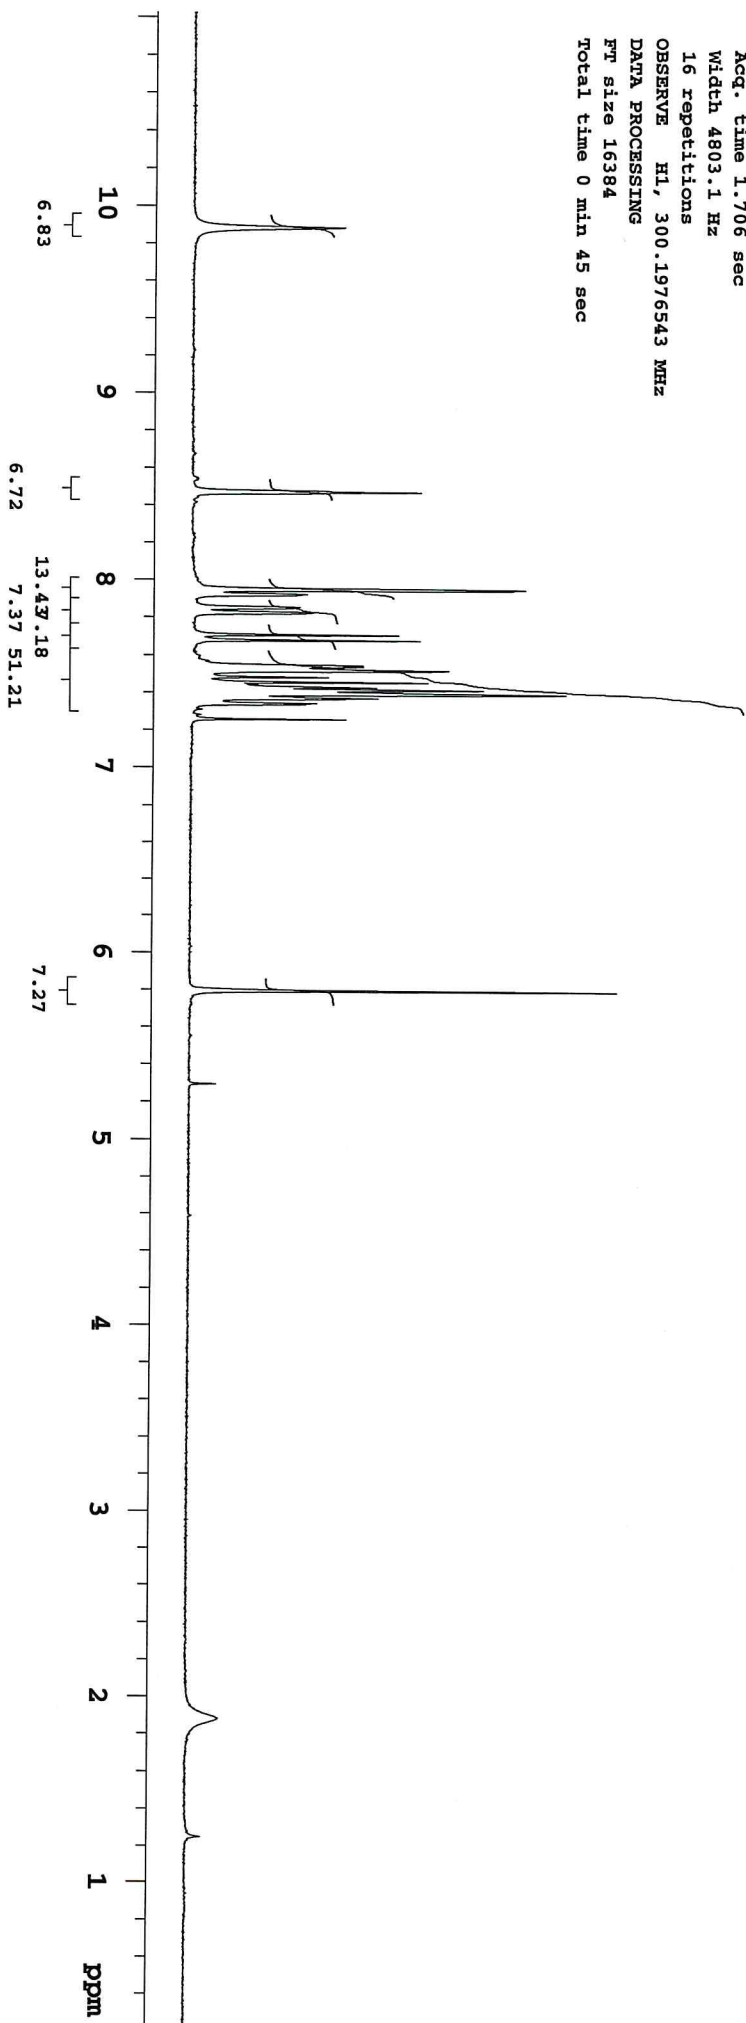

Gradient Shimming

Sample Name:

AA951A

Data Collected on:

m300-mercury300

Archive directory:

/home/ammazza/vnmrSYS/data

Sample directory:

MF255\_20150422\_01

Fidfile: CARBON

Pulse Sequence: CARBON (s2pul)

Solvent: cdcl3

Data collected on: Oct 7 2020

Operator: ammazza

Relax. delay 1.000 sec

Pulse 45.0 degrees

Acq. time 0.868 sec

Width 18867.9 Hz

5000 repetitions

OBSERVE C13, 75.4847602 MHz

DECOUPLE H1, 300.1991980 MHz

Power 38 dB

continuously on

WALTZ-16 modulated

DATA PROCESSING

Line broadening 0.5 Hz

FT size 32768

Total time 2 hr, 41 min

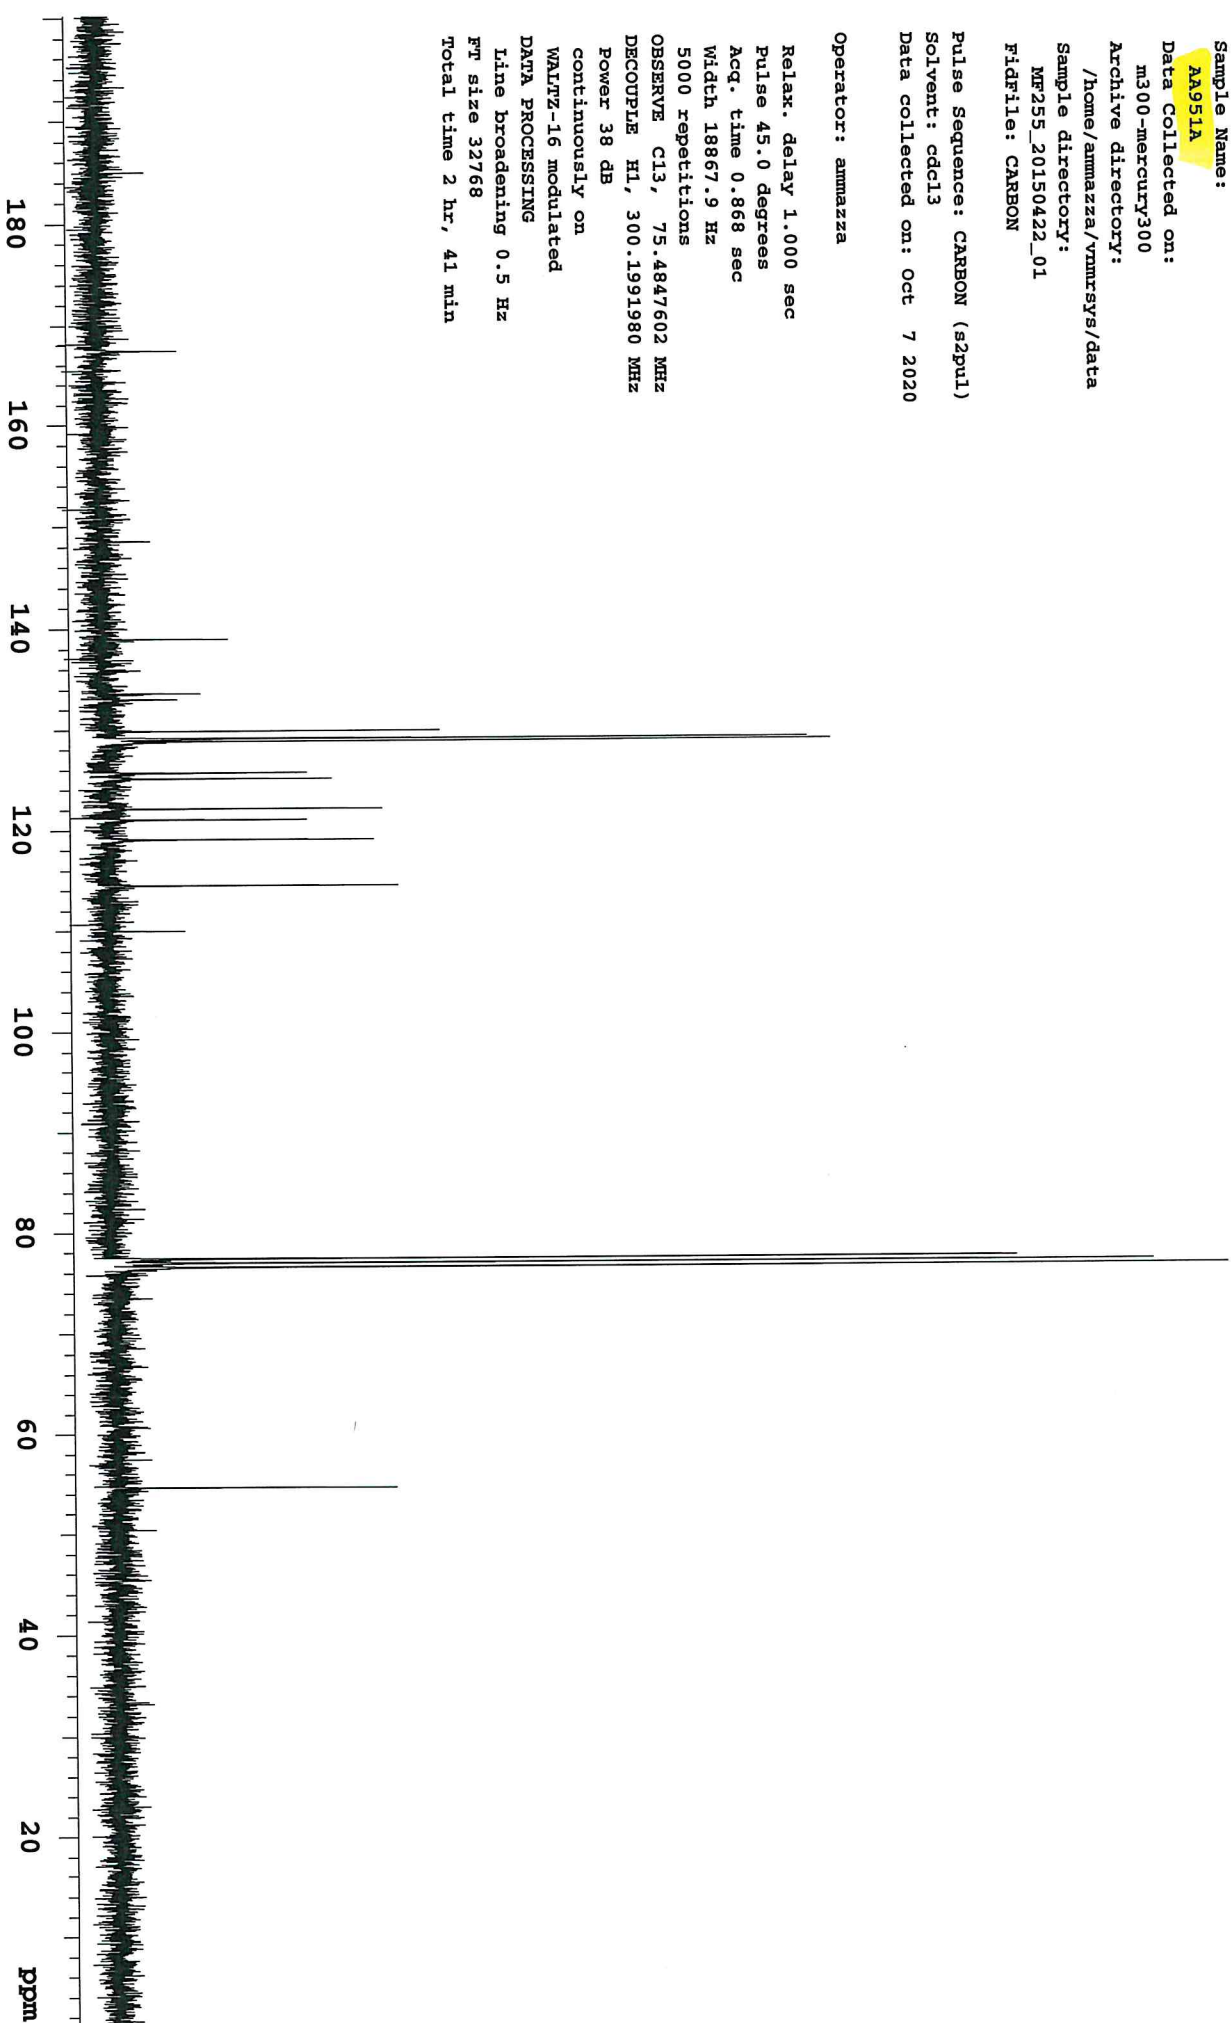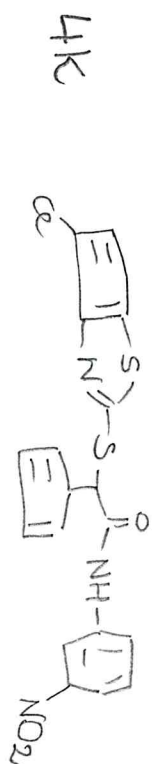

Gradient Shimming

Sample Name:

AA1016ppt

Data Collected on:

m300-mercury300

Archive directory:

/home/ammazza/vnmrSYS/data

Sample directory:

AA1008A\_20210409\_01

FidFile: AA1016ppt

Pulse Sequence: PROTON (s2pul1)

Solvent: cdcl3

Data collected on: Apr 22 2021

Operator: ammazza

Relax. delay 1.000 sec

Pulse 45.0 degrees

Acq. time 1.706 sec

Width 4803.1 Hz

16 repetitions

OBSERVE H1, 300.1976543 MHz

DATA PROCESSING

FT size 16384

Total time 0 min 45 sec

42

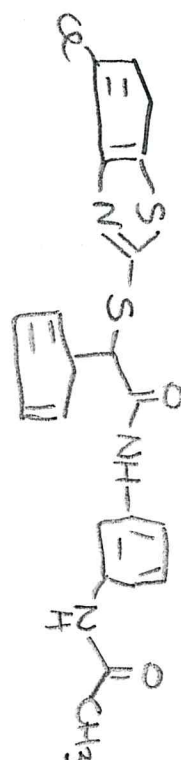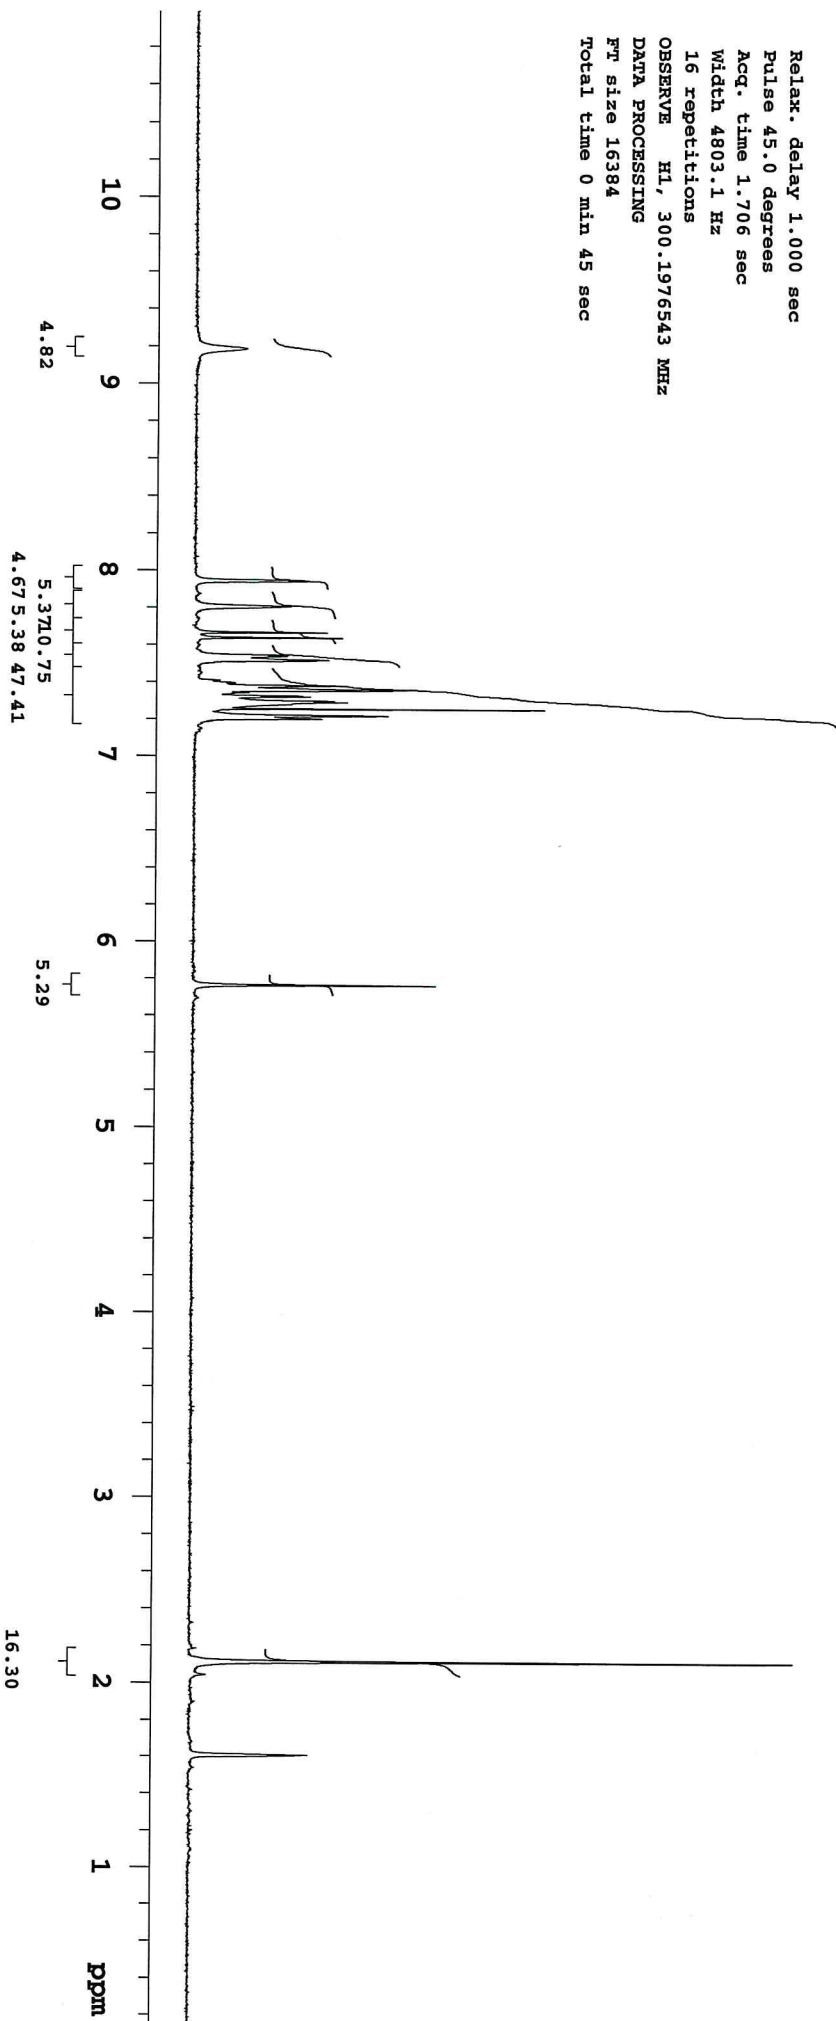



Gradient Shimming

42

Sample Name:

AA1016ppt

Data Collected on:

m300-mercury300

Archive directory:

/home/ammazza/vnmrSYS/data

Sample directory:

AA1008A\_20210409\_01

File: AA1016ppt\_C13

Pulse Sequence: CARBON (s2p1)

Solvent: cdcl3

Data collected on: Apr 26 2021

Operator: ammazza

Relax. delay 1.000 sec

Pulse 45.0 degrees

Acq. time 0.868 sec

Width 18867.9 Hz

1856 repetitions

OBSERVE C13, 75.4847602 MHz

DECOUPLE H1, 300.1991980 MHz

Power 38 dB

continuously on

WALTZ-16 modulated

DATA PROCESSING

Line broadening 0.5 Hz

FT size 32768

Total time 1 hr, 36 min

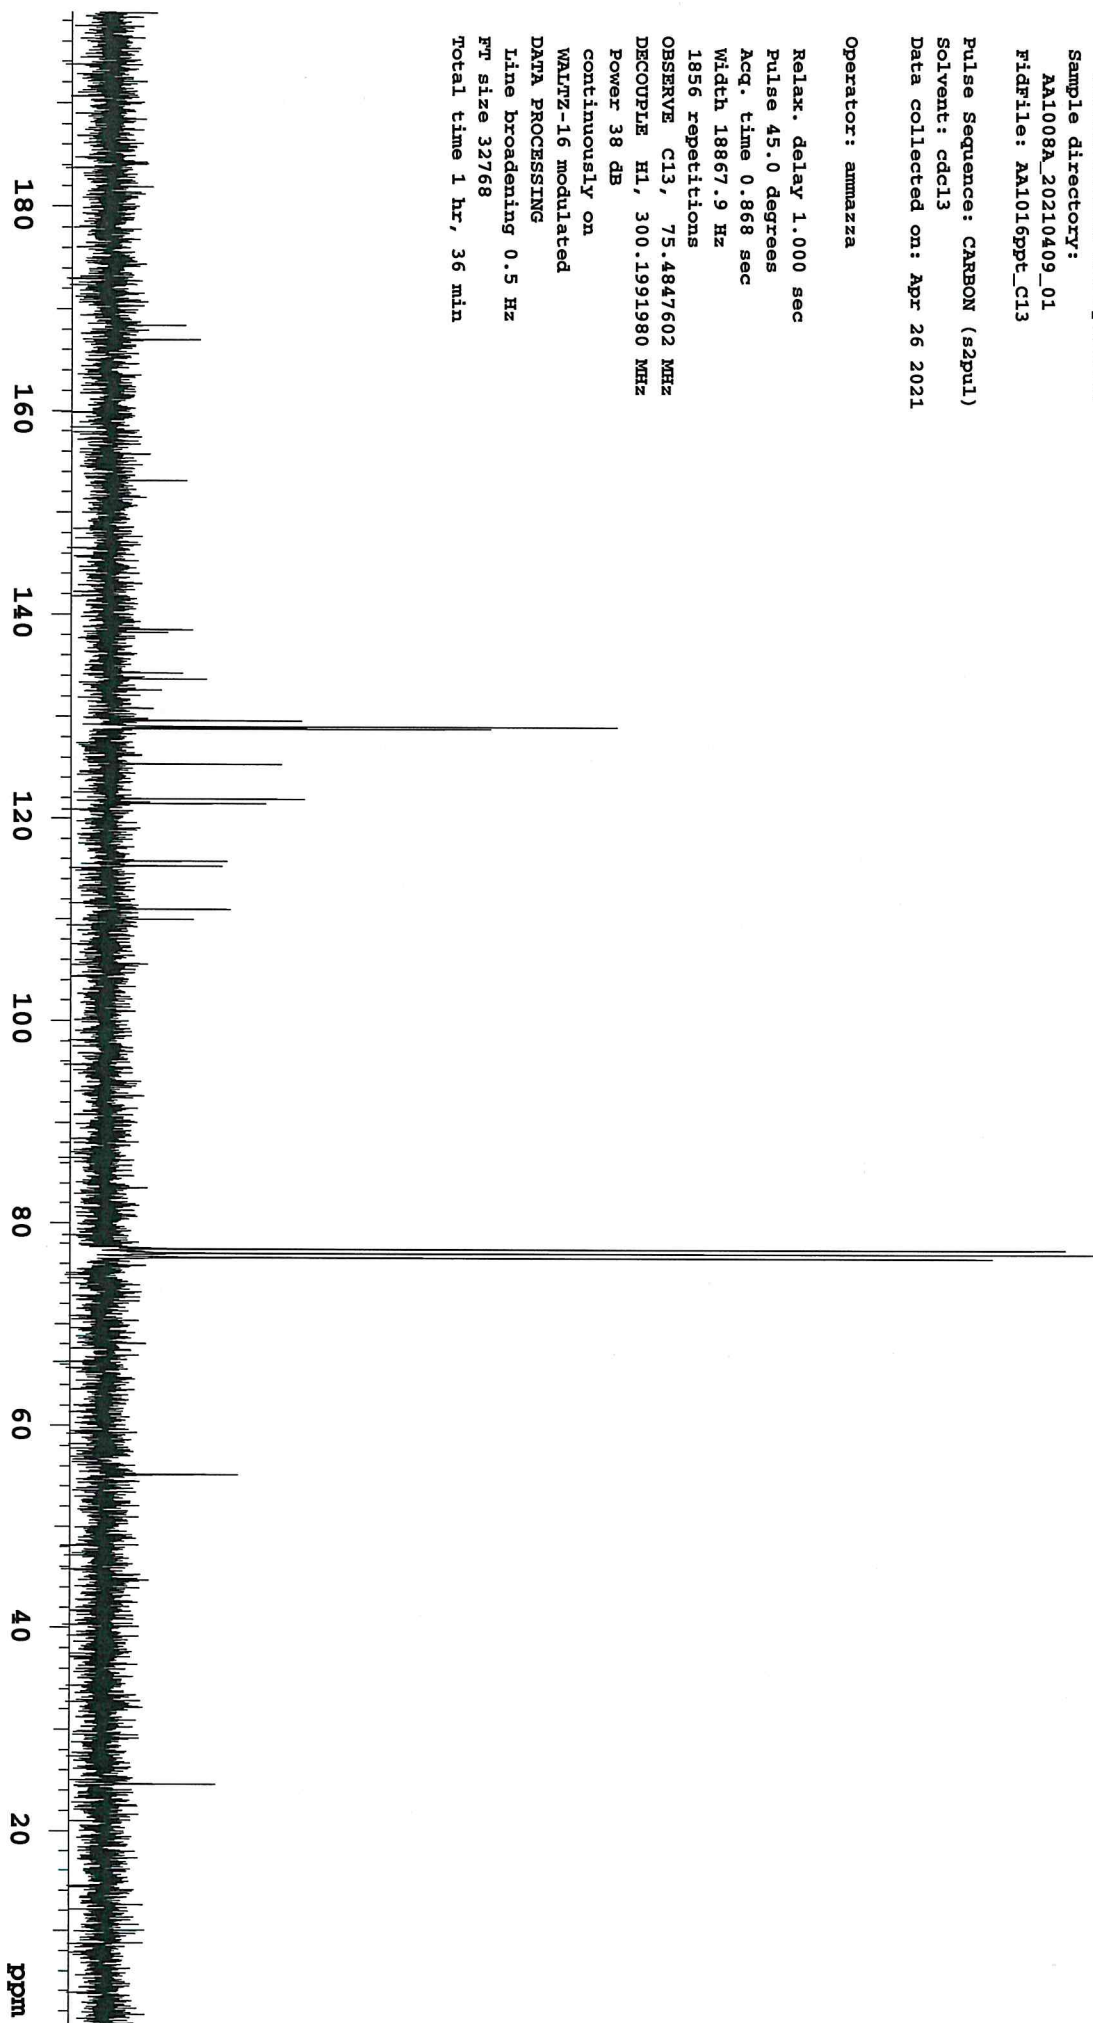



Gradient Shimming

Sample Name:

AA950Admso

Data Collected on:

m300-mercury300

Archive directory:

/home/ammazza/vnmrSYS/data

Sample directory:

MF255\_20150422\_01

Fidfile: AA950Admso

Pulse Sequence: PROTON (s2pul)

Solvent: dmso

Data collected on: Oct 14 2020

Operator: ammazza

Relax. delay 1.000 sec

Pulse 45.0 degrees

Acq. time 1.706 sec

Width 4803.1 Hz

16 repetitions

OBSERVE H1, 300.1990802 MHz

DATA PROCESSING

FT size 16384

Total time 0 min 45 sec

4m

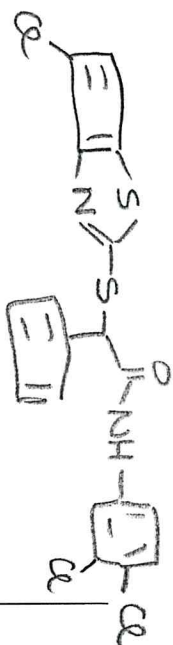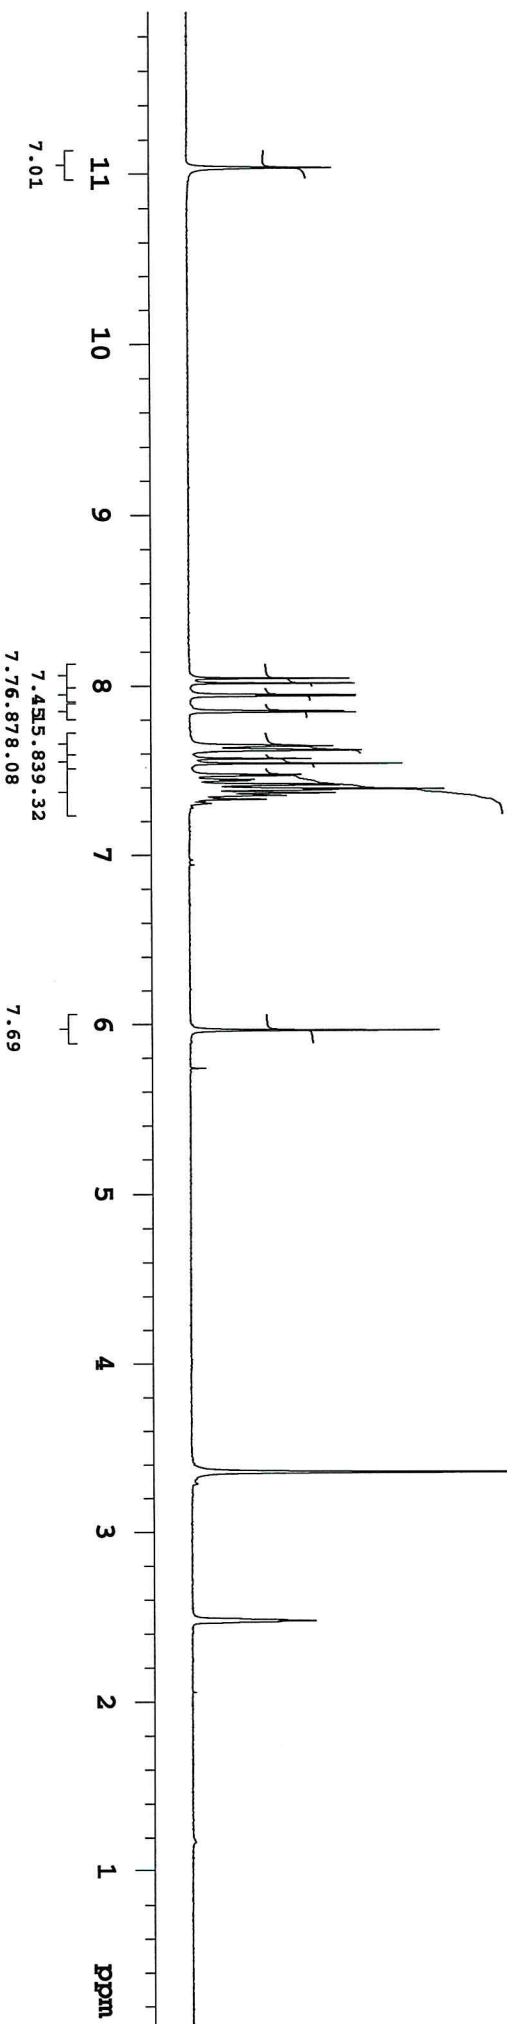

4m

Gradient Shimming

Sample Name: AA950Adms0  
Data Collected on: m300-mercury300  
Archive directory: /home/ammazza/vnmrsys/data  
Sample directory: MF255\_20150422\_01  
Fidfile: CARBON

Pulse Sequence: CARBON (s2pul)  
Solvent: dmsc  
Data collected on: Oct 14 2020

Temp. 16.7 C / 289.9 K  
Operator: ammazza

Relax. delay 1.000 sec  
Pulse 45.0 degrees  
Acq. time 0.868 sec  
Width 18867.9 Hz  
3840 repetitions  
OBSERVE C13, 75.485118 MHz  
DECOUPLE H1, 300.2006240 MHz  
Power 38 dB  
continuously on  
WALTZ-16 modulated  
DATA PROCESSING  
line broadening 0.5 Hz  
FT size 32768  
Total time 2 hr, 41 min

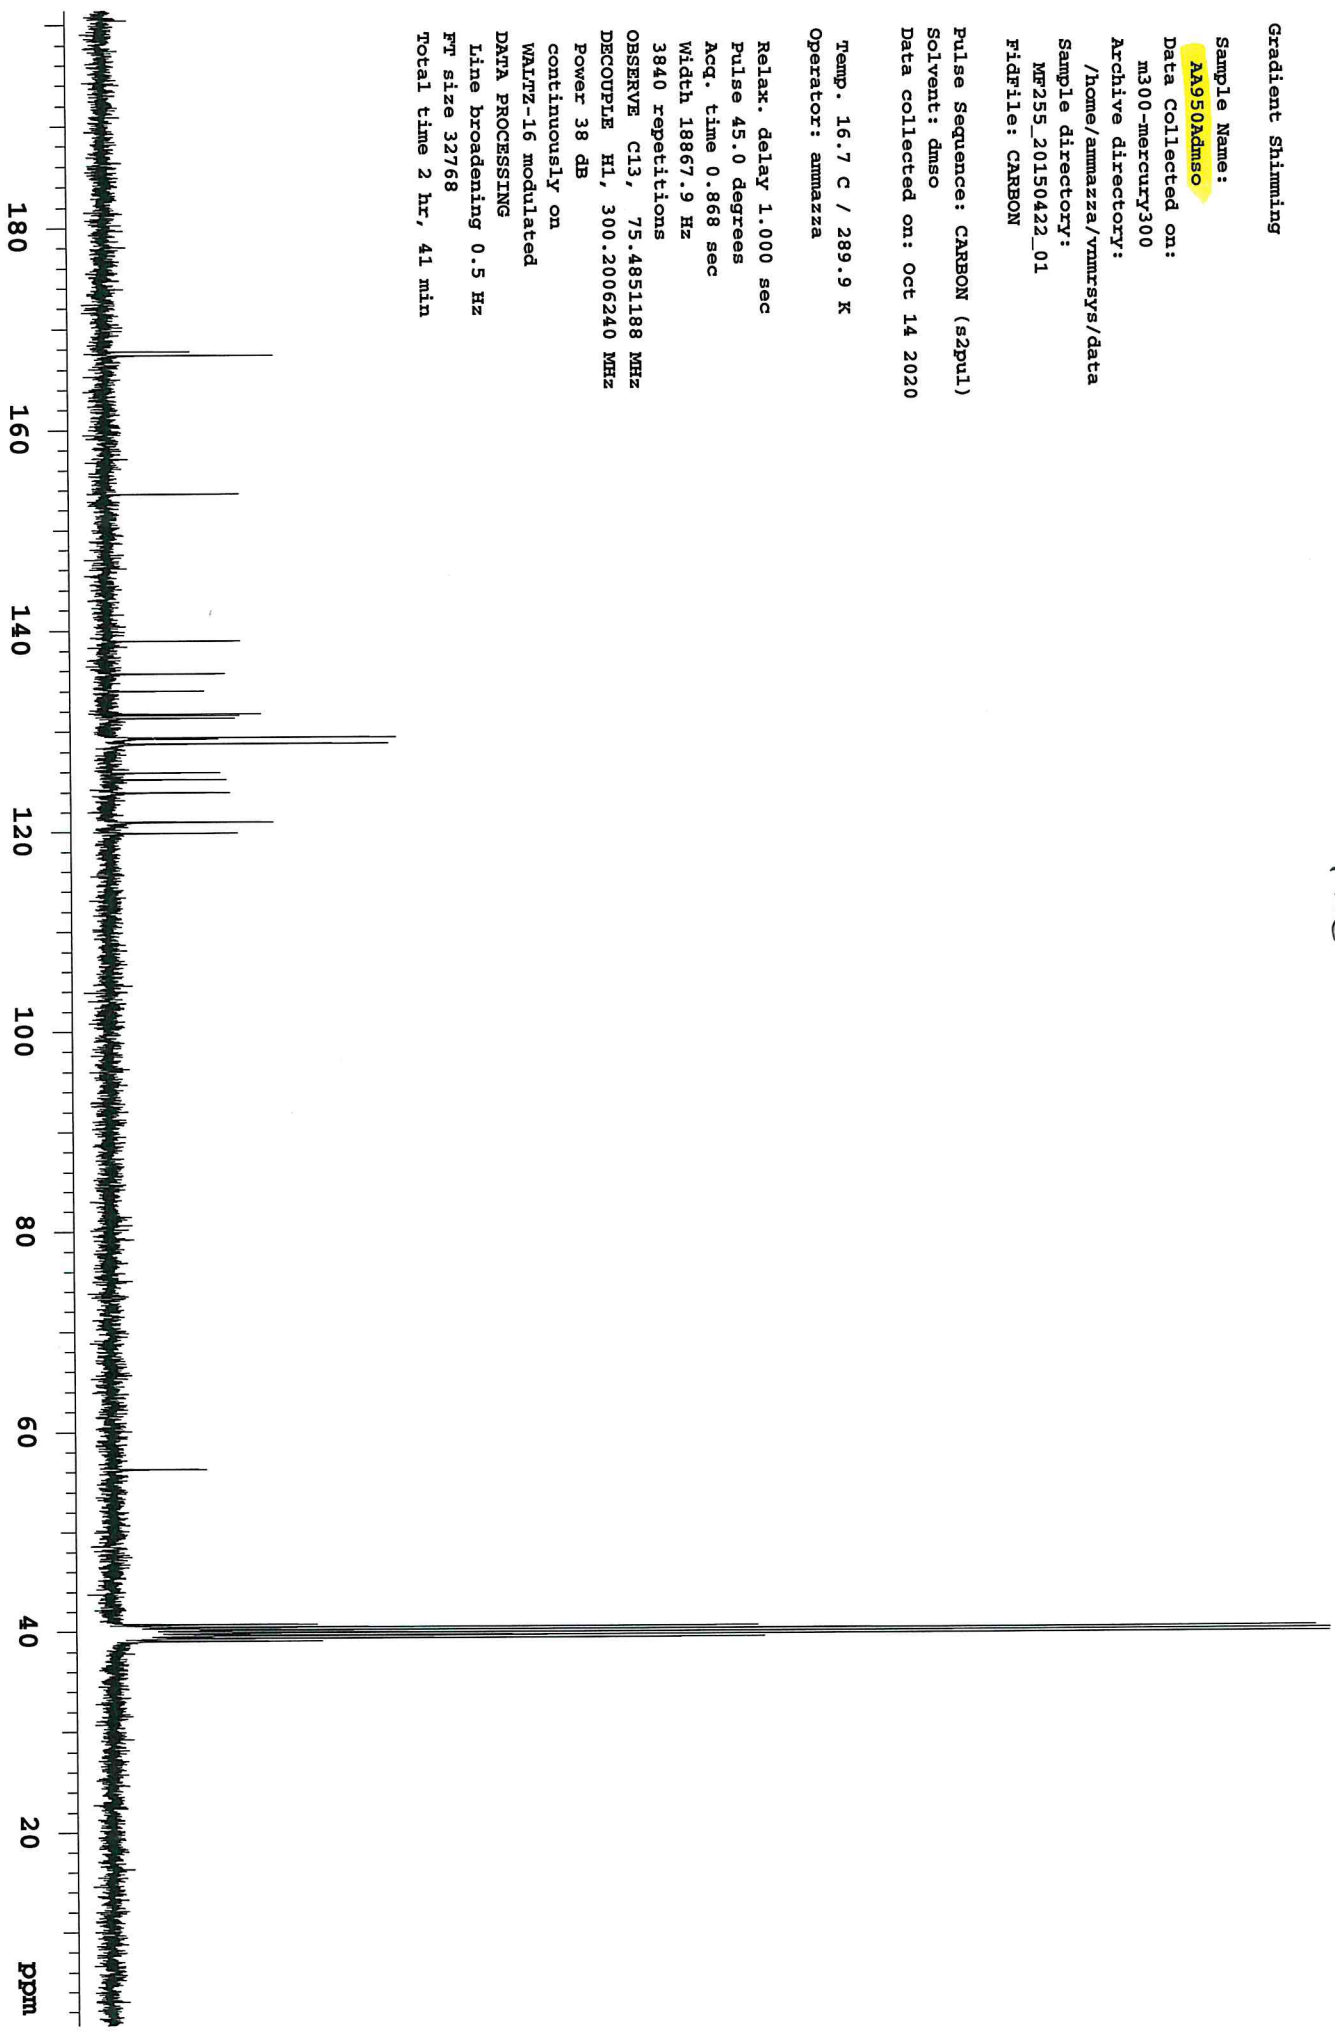

Gradient Shimming

Sample Name:

AA964ppt

Data Collected on:

m300-mercury300

Archive directory:

/home/ammaza/vnmrSYS/data

Sample directory:

MF255\_20150422\_01

FidFile: PROTON

Pulse Sequence: PROTON (s2pul)

Solvent: cdcl3

Data collected on: Feb 12 2021

Operator: ammaza

Relax. delay 1.000 sec

Pulse 45.0 degrees

Acq. time 1.706 sec

Width 4803.1 Hz

16 repetitions

OBSERVE H1, 300.197543 MHz

DATA PROCESSING

FT size 16384

Total time 0 min 45 sec

4n

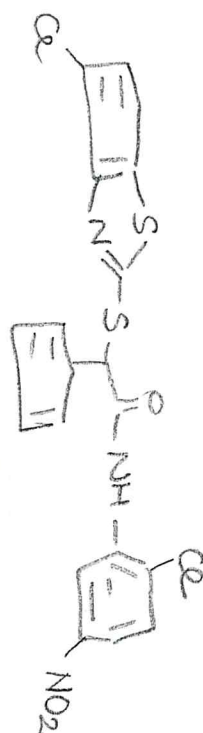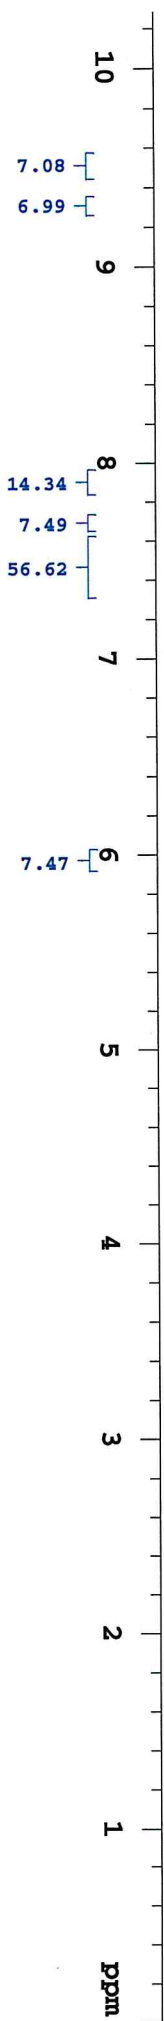

4n

Gradient Shimming

Sample Name:

AA964ppt

Data Collected on:

m300-mercury300

Archive directory:

/home/ammazza/vnmrsys/data

Sample directory:

MF255\_20150422\_01

Fidfile: CARBON

Pulse Sequence: CARBON (szpul)

Solvent: cdcl3

Data collected on: Feb 12 2021

Temp. 17.6 C / 290.8 K

Operator: ammazza

Relax. delay 1.000 sec

Pulse 45.0 degrees

Acq. time 0.868 sec

Width 18867.9 Hz

1600 repetitions

OBSERVE C13, 75.4847602 MHz

DECOUPLE H1, 300.1991980 MHz

Power 38 dB

continuously on

WALTZ-16 modulated

DATA PROCESSING

Line broadening 0.5 Hz

FT size 32768

Total time 1 hr, 36 min

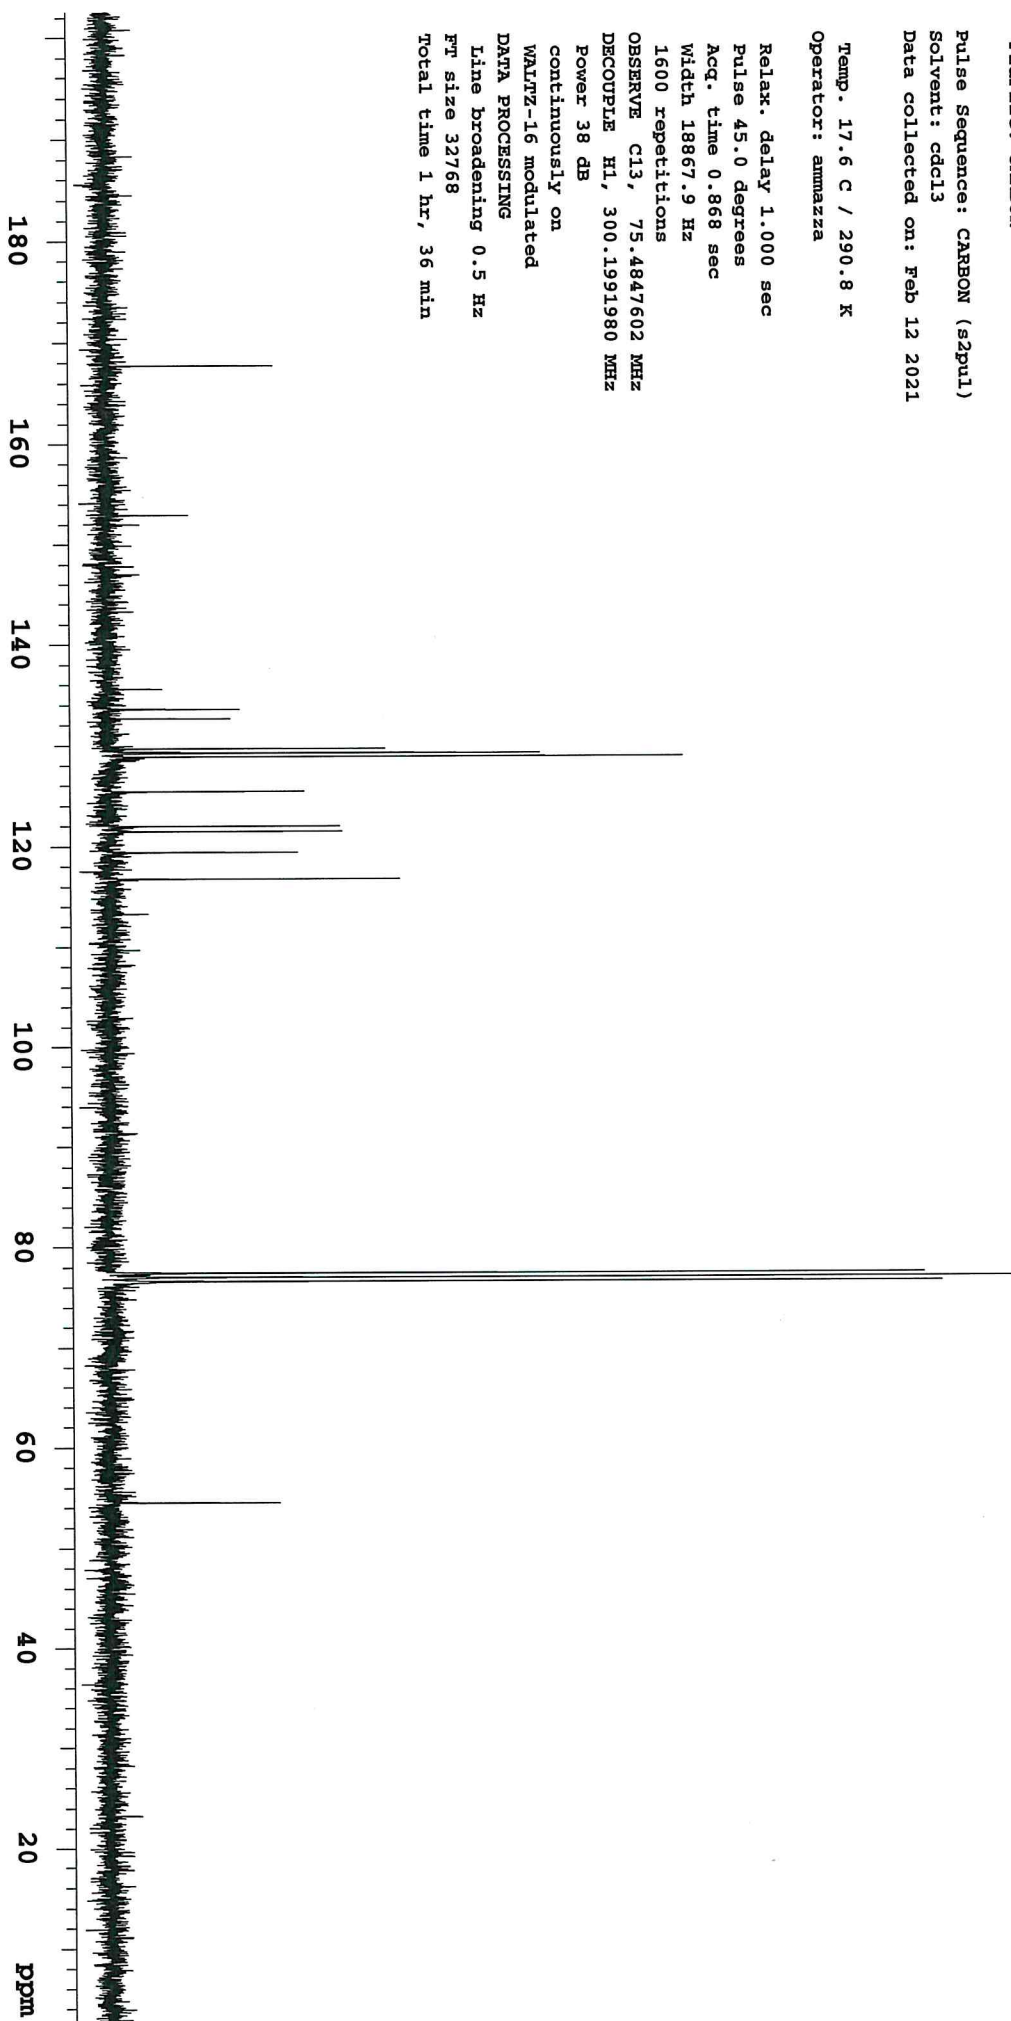

Gradient Shimming

Sample Name:

AA963ppt

Data Collected on:

m300-mercury300

Archive directory:

/home/ammazza/vnmrSYS/data

Sample directory:

MF255\_20150422\_01

Fidfile: AA963ppt

Pulse Sequence: PROTON (s2pul)

Solvent: cdcl3

Data collected on: Feb 25 2021

Operator: ammazza

Relax. delay 1.000 sec

Pulse 45.0 degrees

Acq. time 1.706 sec

Width 4803.1 Hz

16 repetitions

OBSERVE H1, 300.1976543 MHz

DATA PROCESSING

FT size 16384

Total time 0 min 45 sec

40

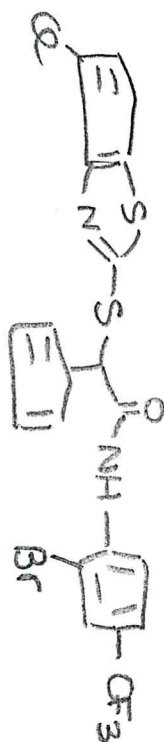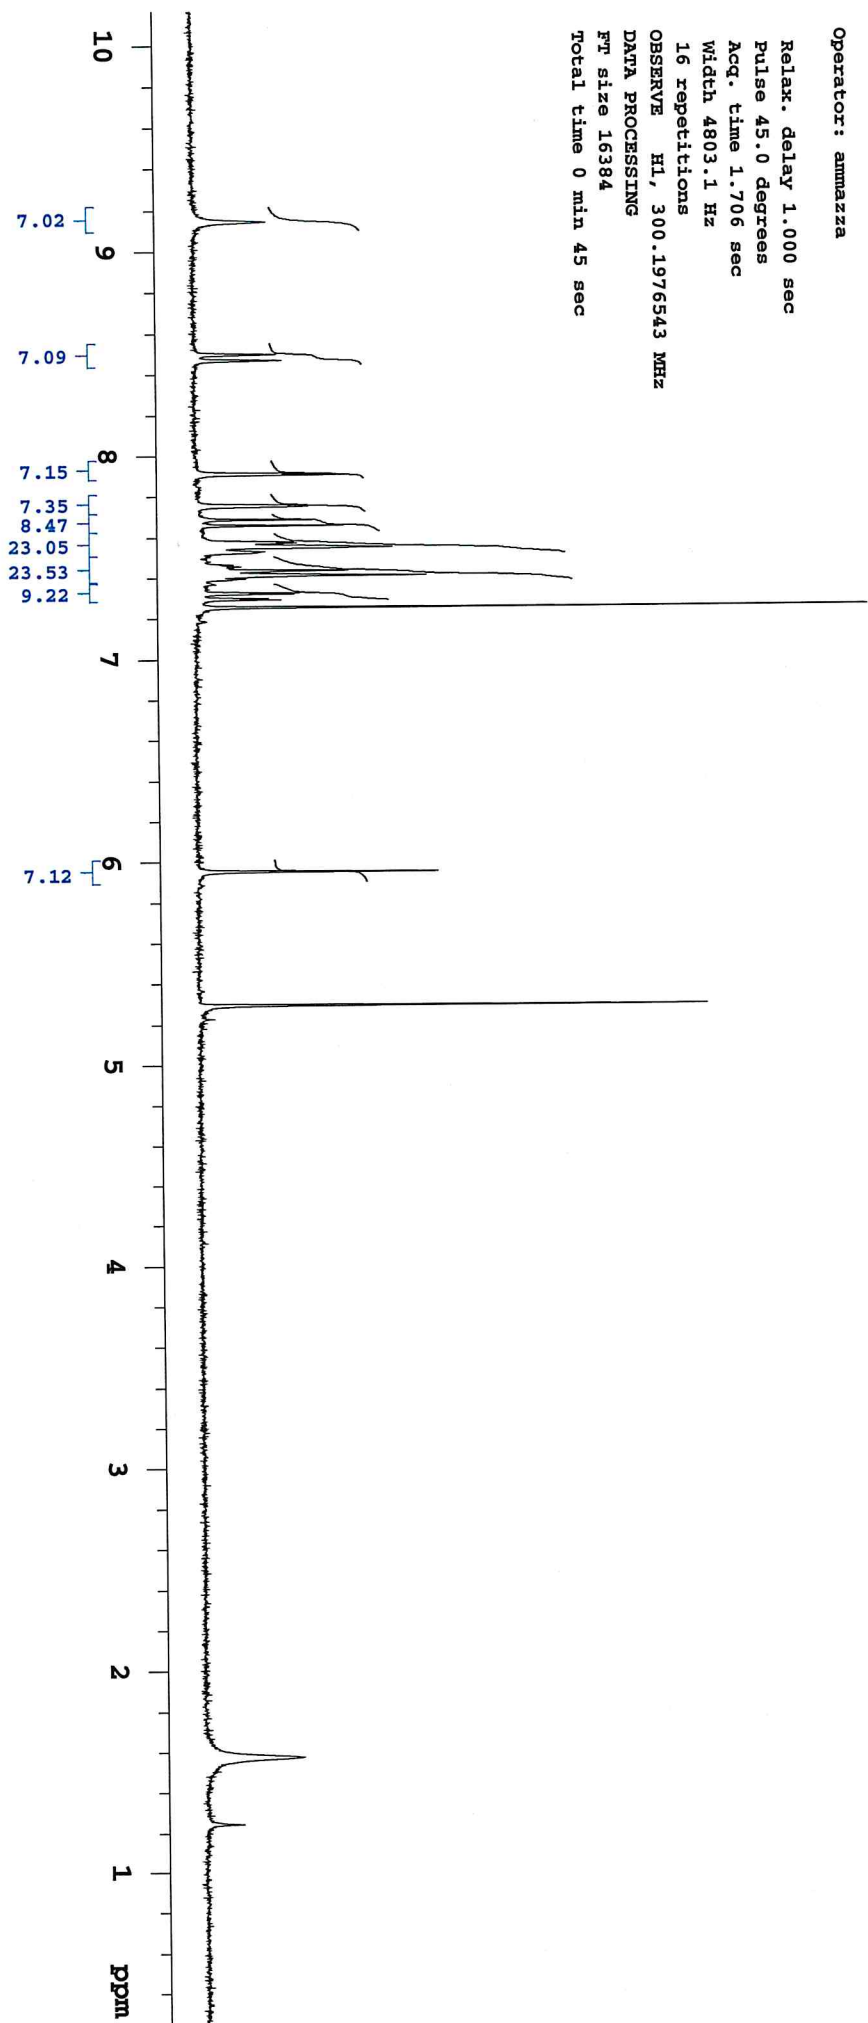

Gradient Shimming

Sample Name:

AA963ppt

Data Collected on:

m300-mercury300

Archive directory:

/home/ammazza/vnmrSYS/data

Sample directory:

AA1008A\_20210409\_01

Fidfile: CARBON

Pulse Sequence: CARBON (s2pu1)

Solvent: cdcl3

Data collected on: Apr 22 2021

Temp. 17.5 C / 290.6 K

Operator: ammazza

Relax. delay 1.000 sec

Pulse 45.0 degrees

Acq. time 0.868 sec

Width 18867.9 Hz

30976 repetitions

OBSERVE C13, 75.4847602 MHz

DECOUPLE H1, 300.1991980 MHz

Power 38 dB

continuously on

WALTZ-16 modulated

DATA PROCESSING

Line broadening 0.5 Hz

FT size 32768

Total time 53 hr, 41 min

40

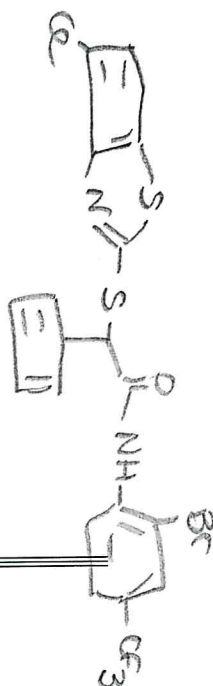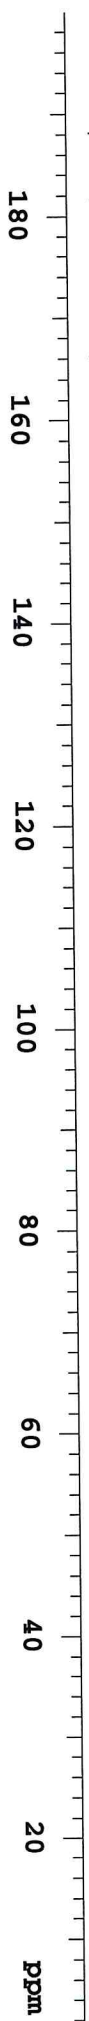

Gradient Shimming

Sample Name:

AA962A

Data Collected on:

m300-mercury300

Archive directory:

/home/ammazza/vnmrSYS/data

Sample directory:

MF255\_20150422\_01

FidFile: AA962Acrisr

Pulse Sequence: PROTON (s2pu1)

Solvent: cdcl3

Data collected on: Feb 24 2021

Operator: ammazza

Relax. delay 1.000 sec

Pulse 45.0 degrees

Acq. time 1.706 sec

Width 4803.1 Hz

16 repetitions

OBSERVE H1, 300.1976543 MHz

DATA PROCESSING

FT size 16384

Total time 0 min 45 sec

4p

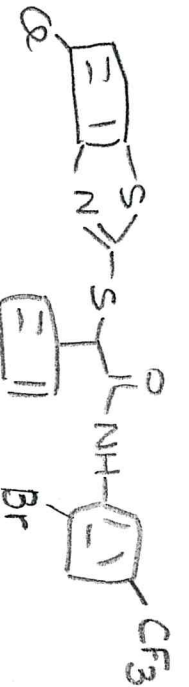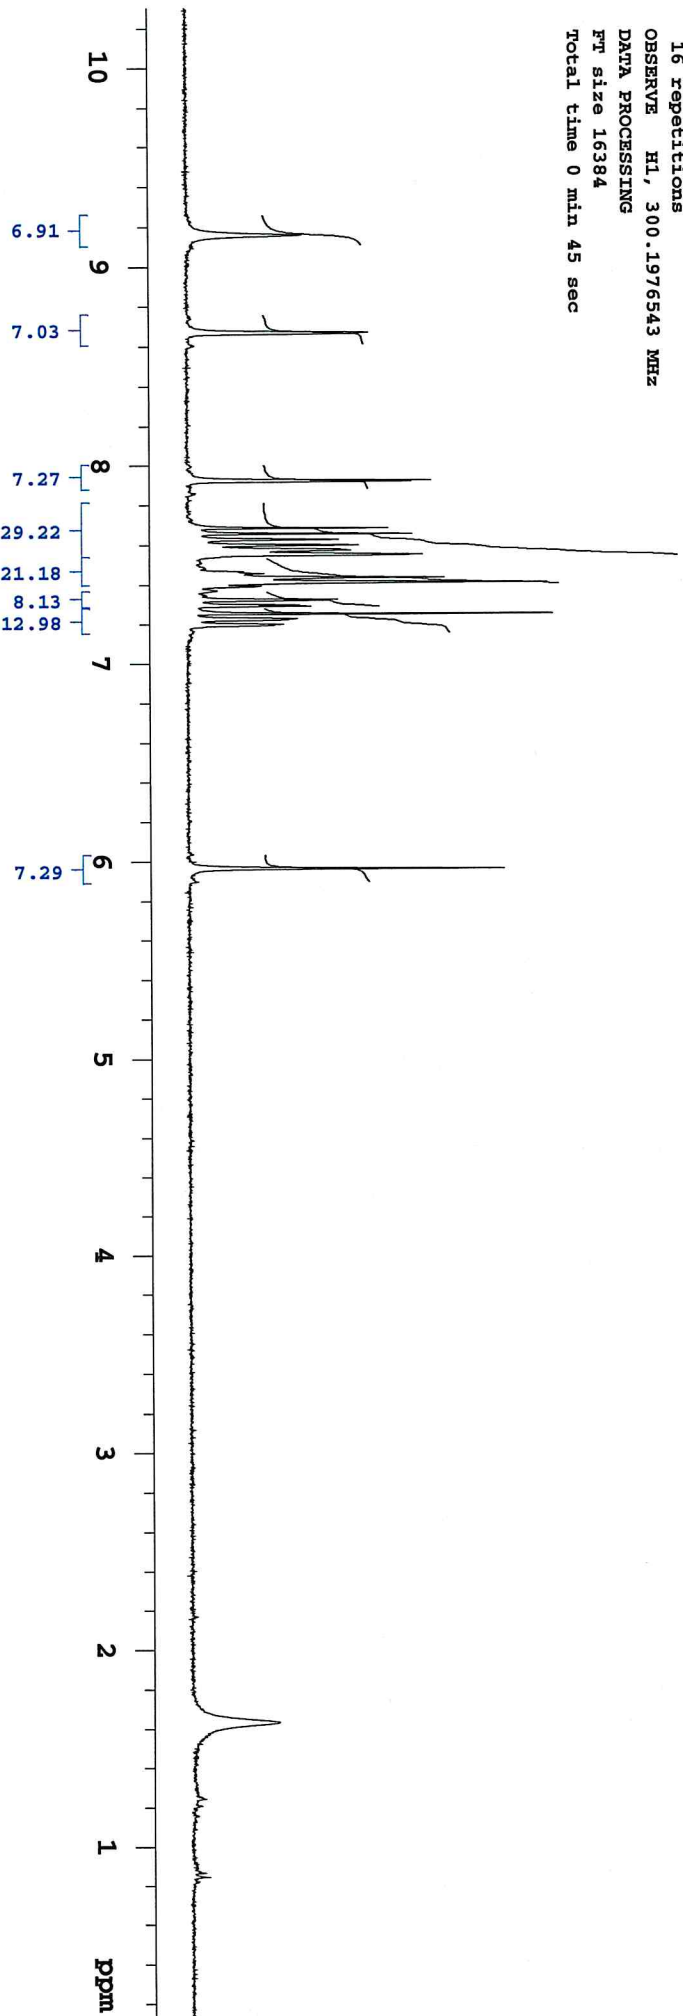

4p

Gradient Shimming

Sample Name:

AA962A **Cryst**

Data Collected on:

m300-mercury300

Archive directory:

/home/ammazza/vnmrsys/data

Sample directory:

ME255\_20150422\_01

Fidfile: CARBON

Pulse Sequence: CARBON (s2pu1)

Solvent: cdcl3

Data collected on: Mar 3 2021

Temp. 17.4 C / 290.6 K

Operator: ammazza

Relax. delay 1.000 sec

Pulse 45.0 degrees

Acq. time 0.868 sec

Width 18867.9 Hz

2624 repetitions

OBSERVE C13, 75.4847602 MHz

DECOUPLE H1, 300.1991980 MHz

Power 38 dB

continuously on

WALTZ-16 modulated

DATA PROCESSING

Line broadening 0.5 Hz

FT size 32768

Total time 2 hr, 8 min

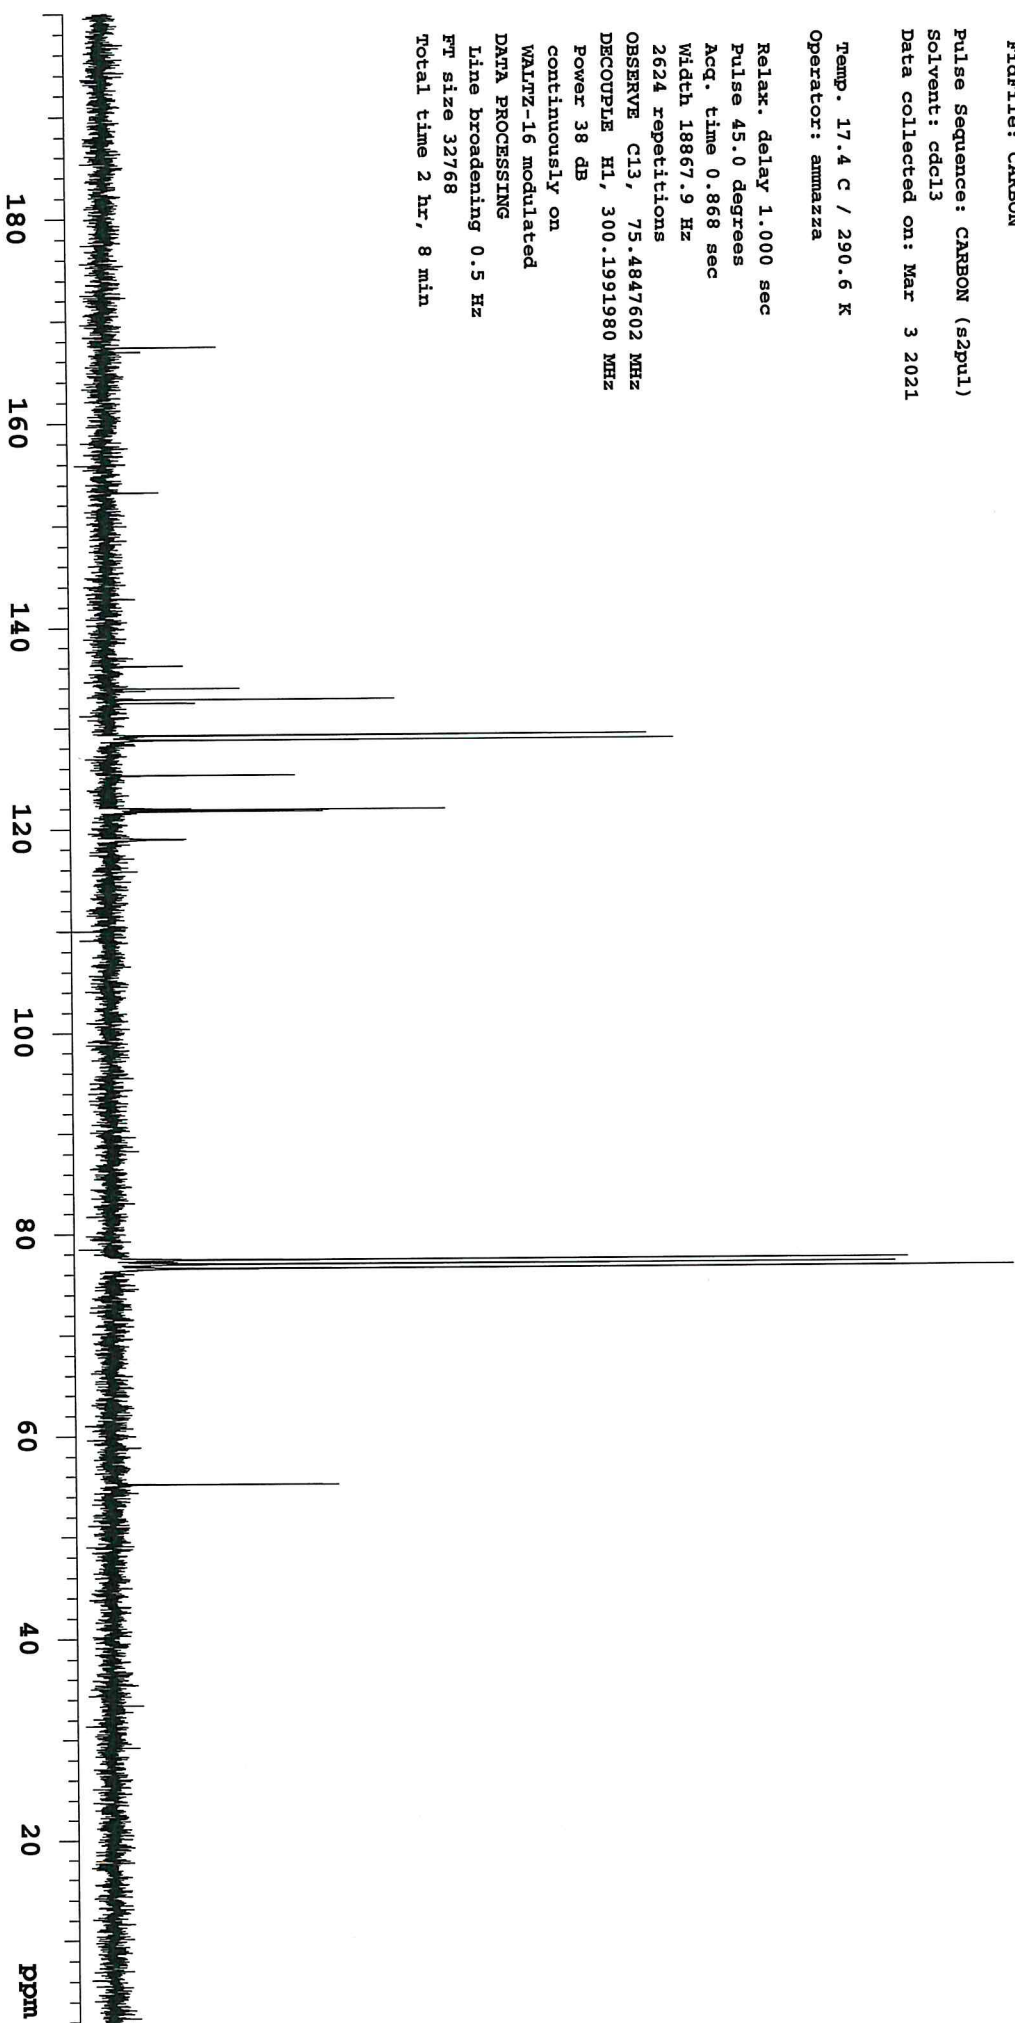

Supplement: s1 [file s1]
